# 1 **The *Clostridioides difficile* species problem: global phylogenomic** 2 **analysis uncovers three ancient, toxigenic, genomospecies**

3 Daniel R. Knight<sup>1</sup>, Korakrit Imwattana<sup>2,3</sup>, Brian Kullin<sup>4</sup>, Enzo Guerrero-Araya<sup>5,6</sup>, Daniel Paredes-  
4 Sabja<sup>5,6,7</sup>, Xavier Didelot<sup>8</sup>, Kate E. Dingle<sup>9</sup>, David W. Eyre<sup>10</sup>, César Rodríguez<sup>11</sup>, and Thomas V.  
5 Riley<sup>1,2,12,13\*</sup>

6 <sup>1</sup> Medical, Molecular and Forensic Sciences, Murdoch University, Murdoch, Western Australia, Australia. <sup>2</sup> School of  
7 Biomedical Sciences, the University of Western Australia, Nedlands, Western Australia, Australia. <sup>3</sup> Department of  
8 Microbiology, Faculty of Medicine Siriraj Hospital, Mahidol University, Thailand. <sup>4</sup> Department of Pathology, University  
9 of Cape Town, Cape Town, South Africa. <sup>5</sup> Microbiota-Host Interactions and Clostridia Research Group, Facultad de  
10 Ciencias de la Vida, Universidad Andrés Bello, Santiago, Chile. <sup>6</sup> Millenium Nucleus in the Biology of Intestinal  
11 Microbiota, Santiago, Chile. <sup>7</sup> Department of Biology, Texas A&M University, College Station, TX, 77843, USA. <sup>8</sup> School  
12 of Life Sciences and Department of Statistics, University of Warwick, Coventry, UK. <sup>9</sup> Nuffield Department of Clinical  
13 Medicine, University of Oxford, Oxford, UK; National Institute for Health Research (NIHR) Oxford Biomedical  
14 Research Centre, John Radcliffe Hospital, Oxford, UK. <sup>10</sup> Big Data Institute, Nuffield Department of Population Health,  
15 University of Oxford, Oxford, UK; National Institute for Health Research (NIHR) Oxford Biomedical Research Centre,  
16 John Radcliffe Hospital, Oxford, UK. <sup>11</sup> Facultad de Microbiología & Centro de Investigación en Enfermedades  
17 Tropicales (CIET), Universidad de Costa Rica, San José, Costa Rica. <sup>12</sup> School of Medical and Health Sciences, Edith  
18 Cowan University, Joondalup, Western Australia, Australia. <sup>13</sup> Department of Microbiology, PathWest Laboratory  
19 Medicine, Queen Elizabeth II Medical Centre, Nedlands, Western Australia, Australia.

20 \*Address correspondence to Professor Thomas V. Riley (thomas.riley@uwa.edu.au), School of  
21 Biomedical Sciences, The University of Western Australia, Nedlands, Western Australia, Australia.

22 Word count (main text): 5088

23 Abstract word count: 148

24

25

## 26 **Abstract**

27 *Clostridioides difficile* infection (CDI) remains an urgent global One Health threat. The genetic  
28 heterogeneity seen across *C. difficile* underscores its wide ecological versatility and has driven the  
29 significant changes in CDI epidemiology seen in the last 20 years. We analysed an international  
30 collection of over 12,000 *C. difficile* genomes spanning the eight currently defined phylogenetic  
31 clades. Through whole-genome average nucleotide identity, pangenomic and Bayesian analyses, we  
32 identified major taxonomic incoherence with clear species boundaries for each of the recently  
33 described cryptic clades CI-III. The emergence of these three novel genomospecies predates clades  
34 C1-5 by millions of years, rewriting the global population structure of *C. difficile* specifically and  
35 taxonomy of the *Peptostreptococcaceae* in general. These genomospecies all show unique and highly  
36 divergent toxin gene architecture, advancing our understanding of the evolution of *C. difficile* and  
37 close relatives. Beyond the taxonomic ramifications, this work impacts the diagnosis of CDI  
38 worldwide.

39

## 40 **Introduction**

41 The bacterial species concept remains controversial, yet it serves as a critical framework for all  
42 aspects of modern microbiology<sup>1</sup>. The prevailing species definition describes a genomically coherent  
43 group of strains sharing high similarity in many independent phenotypic and ecological properties<sup>2</sup>.  
44 The era of whole-genome sequencing (WGS) has seen average nucleotide identity (ANI) replace  
45 DNA-DNA hybridization as the ‘next-generation’ standard for microbial taxonomy<sup>3,4</sup>. Endorsed by  
46 the National Center for Biotechnology Information (NCBI)<sup>4</sup>, ANI provides a precise, objective and  
47 scalable method for delineation of species, defined as monophyletic groups of strains with genomes  
48 that exhibit at least 96% ANI<sup>5,6</sup>.

49 *Clostridioides (Clostridium) difficile* is an important gastrointestinal pathogen that places a  
50 significant growing burden on health care systems in many regions of the world<sup>7</sup>. In both its 2013<sup>8</sup>  
51 and 2019<sup>9</sup> reports on antimicrobial resistance (AMR), the US Centers for Disease Control and  
52 Prevention rated *C. difficile* infection (CDI) as an urgent health threat, the highest level. Community-  
53 associated CDI has become more frequent<sup>7</sup>, likely because *C. difficile* has become established in  
54 livestock worldwide, resulting in significant environmental contamination<sup>10</sup>. Thus, over the last two  
55 decades, CDI has emerged as an important One Health issue<sup>10</sup>.

56 Based on multi-locus sequence type (MLST), there are eight recognised monophyletic groups  
57 or ‘clades’ of *C. difficile*<sup>11</sup>. Strains within these clades show many unique clinical, microbiological  
58 and ecological features<sup>11</sup>. Critical to the pathogenesis of CDI is the expression of the large clostridial  
59 toxins, TcdA and TcdB and, in some strains, binary toxin (CDT), encoded by two separate  
60 chromosomal loci, the PaLoc and CdtLoc, respectively<sup>12</sup>. Clade 1 (C1) contains over 200 toxigenic  
61 and non-toxigenic sequence types (STs) including many of the most prevalent strains causing CDI  
62 worldwide e.g. ST2, ST8, and ST17<sup>11</sup>. Several highly virulent CDT-producing strains, including ST1  
63 (PCR ribotype (RT) 027), a lineage associated with major hospital outbreaks in North America,  
64 Europe and Latin America<sup>13</sup>, are found in clade 2 (C2). Comparatively little is known about clade 3  
65 (C3) although it contains ST5 (RT 023), a toxigenic CDT-producing strain with characteristics that  
66 may make laboratory detection difficult<sup>14</sup>. *C. difficile* ST37 (RT 017) is found in clade 4 (C4) and,  
67 despite the absence of a toxin A gene, is responsible for much of the endemic CDI burden in Asia<sup>15</sup>.  
68 Clade 5 (C5) contains several CDT-producing strains including ST11 (RTs 078, 126 and others),  
69 which are highly prevalent in production animals worldwide<sup>16</sup>. The remaining so-called ‘cryptic’  
70 clades (C-I, C-II and C-III), first described in 2012<sup>17, 18</sup>, contain over 50 STs from clinical and  
71 environmental sources<sup>17, 18, 19, 20, 21</sup>. Evolution of the cryptic clades is poorly understood. Clade C-I  
72 strains can cause CDI, however, due to atypical toxin gene architecture, they may not be detected,  
73 thus their prevalence may have been underestimated<sup>21</sup>.

74 There are over 600 STs currently described and some STs may have access to a gene pool in  
75 excess of 10,000 genes<sup>11, 16, 22</sup>. Considering such enormous diversity, and recent contentious  
76 taxonomic revisions<sup>23, 24</sup>, we hypothesise that *C. difficile* comprises a complex of distinct species  
77 divided along the major evolutionary clades. In this study, whole-genome ANI, and pangenomic and  
78 Bayesian analyses are used to explore an international collection of over 12,000 *C. difficile* genomes,  
79 to provide new insights into ancestry, genetic diversity and evolution of pathogenicity in this  
80 enigmatic pathogen.

## 81 **Results**

82 **An updated global population structure based on sequence typing of 12,000 genomes.** We  
83 obtained and determined the ST and clade for a collection of 12,621 *C. difficile* genomes (taxid ID  
84 1496, Illumina data) existing in the NCBI Sequence Read Archive (SRA) as of 1<sup>st</sup> January 2020. A  
85 total of 272 STs were identified spanning the eight currently described clades, indicating that the SRA  
86 contains genomes for almost 40% of known *C. difficile* STs worldwide (n=659, PubMLST, January  
87 2020). C1 STs dominated the database in both prevalence and diversity (**Fig. 1**) with 149 C1 STs  
88 comprising 57.2% of genomes, followed by C2 (35 STs, 22.9%), C5 (18 STs, 10.2%), C4 (34 STs,  
89 7.5%), C3 (7 STs, 2.0%) and the cryptic clades C-I, C-II and C-III (collectively 17 STs, 0.2%). The  
90 five most prevalent STs represented were ST1 (20.9% of genomes), ST11 (9.8%), ST2 (9.5%), ST37  
91 (6.5%) and ST8 (5.2%), all prominent lineages associated with CDI worldwide<sup>11</sup>.

92 **Fig. 2** shows an updated global *C. difficile* population structure based on the 659 STs; 27  
93 novel STs were found (an increase of 4%) and some corrections to assignments within C1 and C2  
94 were made, including assigning ST122<sup>25</sup> to C1. Based on PubMLST data and bootstraps values of  
95 1.0 in all monophyletic nodes of the cryptic clades (**Fig. 2**), we could confidently assign 25, 9 and 10  
96 STs to cryptic clades I, II and III, respectively. There remained 26 STs spread across the phylogeny  
97 that did not fit within a specific clade (defined as outliers). The tree file for **Fig. 2** and full MLST data  
98 is available as **Supplementary Data** at <http://doi.org/10.6084/m9.figshare.12471461>.

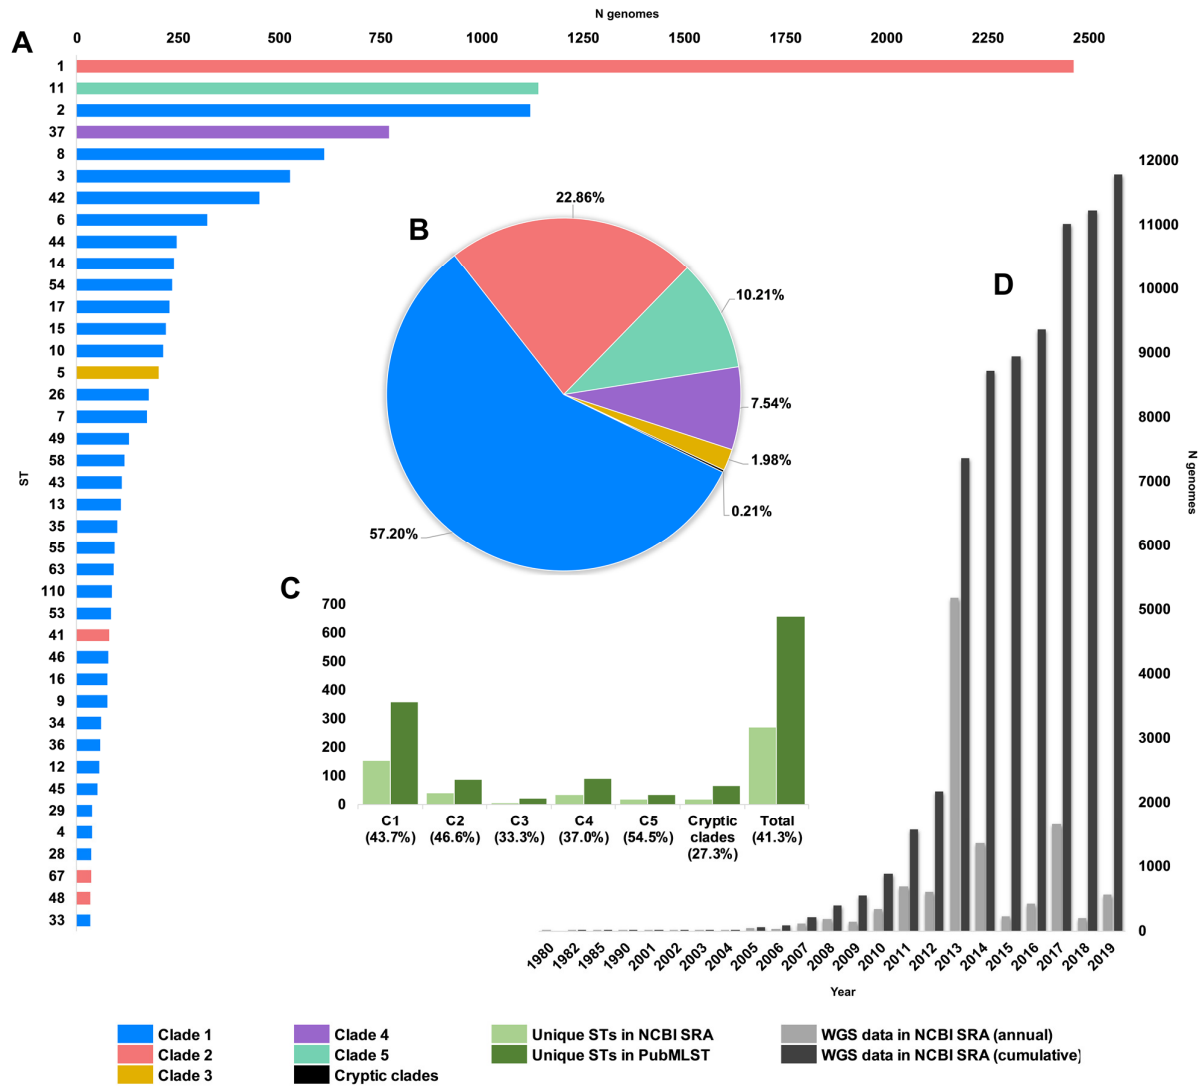

**Figure 1. Composition of *C. difficile* genomes in the NCBI SRA.** Snapshot obtained 1<sup>st</sup> January 2020; 12,304 strains, [taxid ID 1496]. **(A)** Top 40 most prevalent STs in the NCBI SRA coloured by clade. **(B)** The proportion of genomes in ENA by clade. **(C)** Number/ proportion of STs per clade found in the SRA/present in the PubMLST database. **(D)** Annual and cumulative deposition of *C. difficile* genome data in ENA.

99 **Whole-genome ANI analysis reveals clear species boundaries.** Whole-genome ANI analyses were  
 100 used to investigate genetic discontinuity across the *C. difficile* species (**Fig. 3** and **Supplementary**  
 101 **Data**). Representative genomes of each ST, chosen based on metadata, read depth and quality, were  
 102 assembled and annotated. Whole-genome ANI values were determined for a final set of 260 STs  
 103 using three independent ANI algorithms (FastANI, ANIm and ANIb, see *Methods*). All 225 genomes  
 104 belonging to clades C1-4 clustered within an ANI range of 97.1-99.8% (median FastANI values of  
 105 99.2, 98.7, 97.9 and 97.8%, respectively, **Fig. 3A-C**).

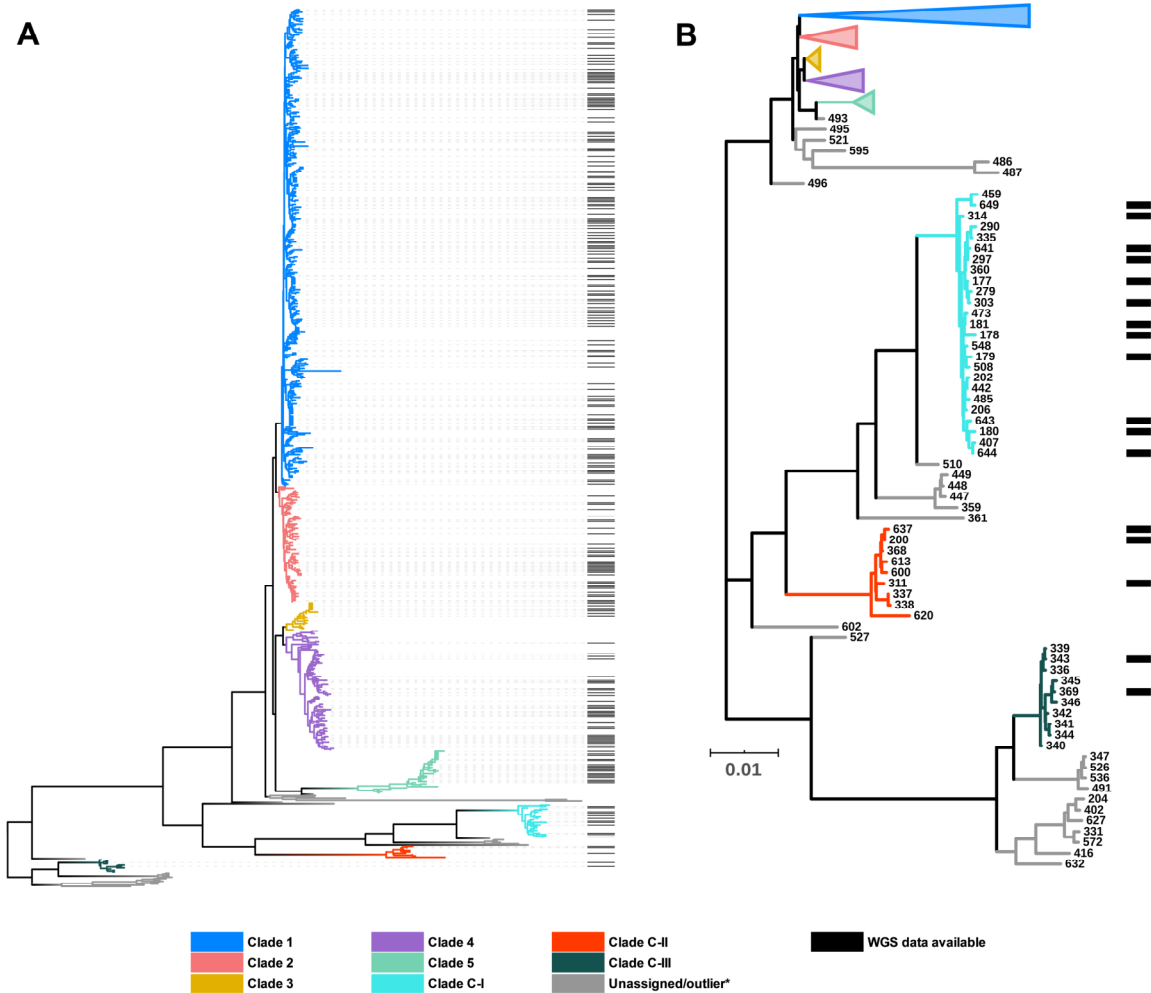

**Figure 2. *C. difficile* population structure.** (A) NJ phylogeny of 659 aligned, concatenated, multilocus sequence type allele combinations coloured by current PubMLST clade assignment. Black bars indicate WGS available for ANI analysis (n=260). (B) A subset of the NJ tree showing cryptic clades C-I, C-II and C-III. Again, black bars indicate WGS available for ANI analysis (n=17).

106 These ANI values are above the 96% species demarcation threshold used by the NCBI<sup>4</sup> and indicate  
 107 that strains from these clades belong to the same species. ANI values for all 18 genomes belonging  
 108 to C5 clustered on the borderline of the species demarcation threshold (FastANI range 95.9-96.2%,  
 109 median 96.1%). ANI values for all three cryptic clades fell well below the species threshold; C-I  
 110 (FastANI range 90.9-91.1%, median 91.0%), C-II (FastANI range 93.6-93.9%, median 93.7%) and  
 111 C-III (FastANI range 89.1-89.1%, median 89.1%). All results were corroborated across the three  
 112 independent ANI algorithms (Fig. 3A-C). *C. difficile* strain ATCC 9689 (ST3, C1) was defined by  
 113 Lawson *et al.* as the type strain for the species<sup>23</sup>, and used as a reference in all the above analyses. To  
 114 better understand the diversity among the divergent clades themselves, FastANI analyses were  
 115 repeated using STs 11, 181, 200 and 369 as reference archetypes of clades C5, C-I, C-II and C-III,  
 116 respectively. This approach confirmed that C5 and the three cryptic clades were as distinct from each  
 117 other as they were collectively from C1-4 (Fig. 3D-G).

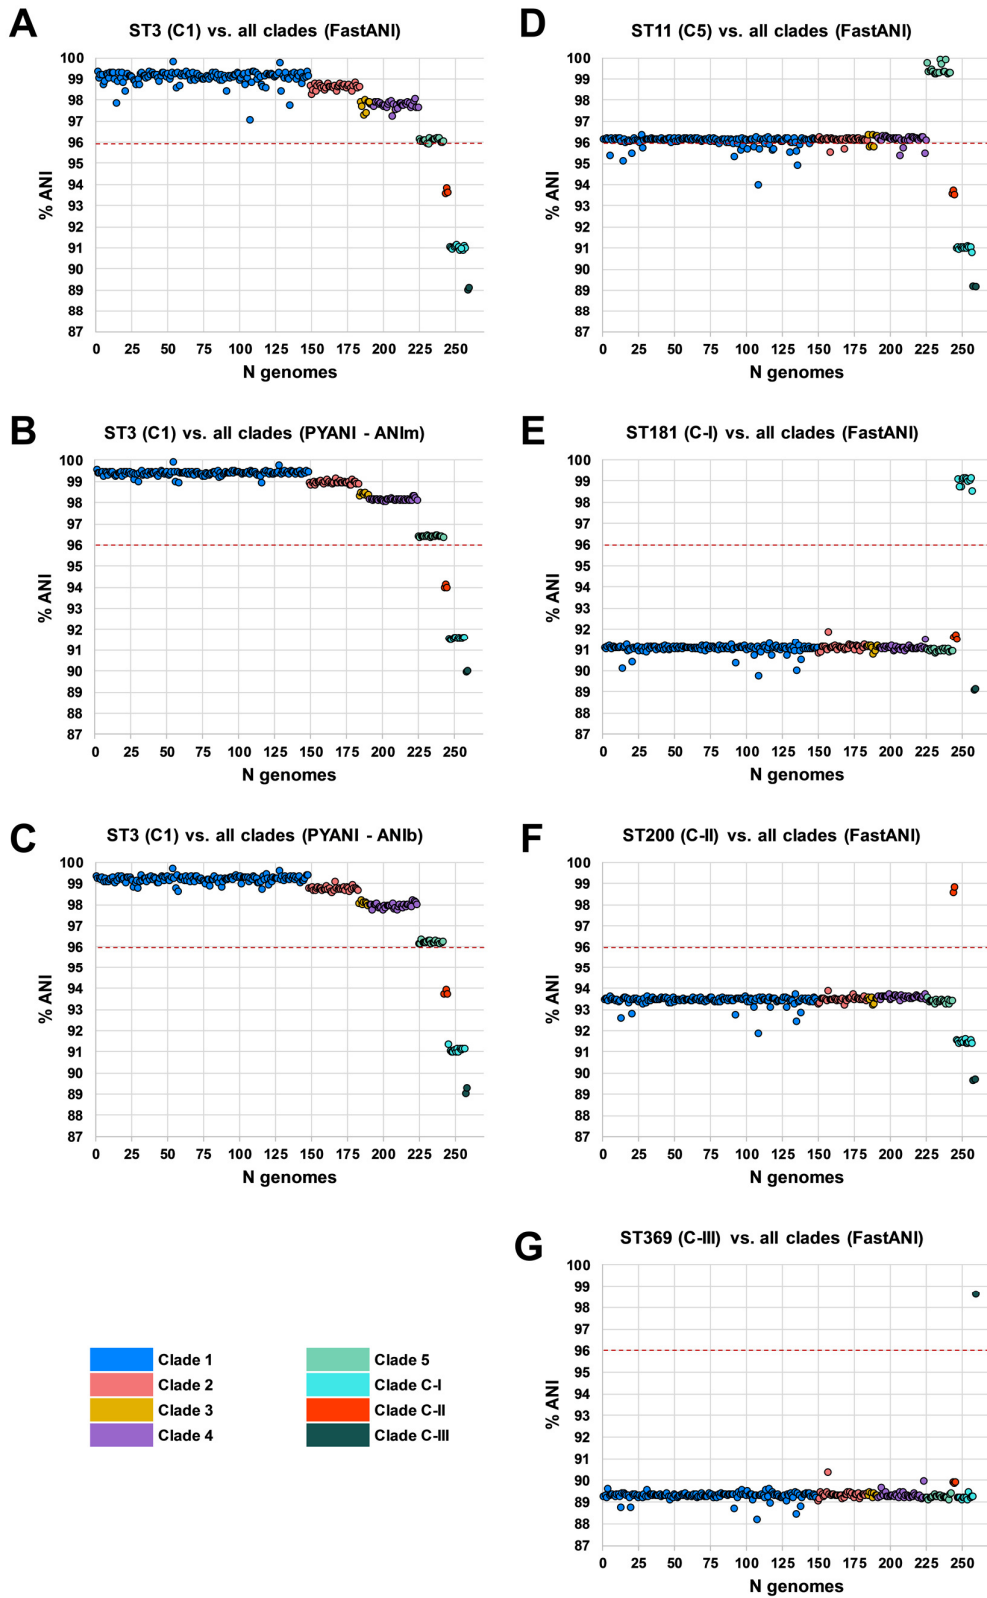

**Figure 3. Species-wide ANI analysis.** Panels A-C show ANI plots for ST3 (C1) vs. all clades (260 STs) using FastANI, ANIm and ANIb algorithms, respectively. Panels D-G show ANI plots for ST11 (C5), ST181 (C-I), ST200 (C-II) and ST369 (C-III) vs all clades (260 STs), respectively. NCBI species demarcation of 96% indicated by red dashed line<sup>4</sup>.

118 **Taxonomic placement of cryptic clades predates *C. difficile* emergence by millions of years.**  
119 Previous studies using BEAST have estimated the common ancestor of C1-5 existed between 1 to 85  
120 or 12 to 14 million years ago (mya)<sup>26, 27</sup>. Here, we used an alternative Bayesian approach, BactDating,  
121 to estimate the age of all eight *C. difficile* clades currently described. The last common ancestor for  
122 *C. difficile* clades C1-5 was estimated to have existed ~3.89 mya with a 95% credible interval (CI) of  
123 1.11 to 6.71 mya (Fig. 4). In contrast, C-II, C-I and C-III emerged 13.05 mya (95% CI 3.72-22.44),  
124 22.02 (95% CI 6.28-37.83) and 47.61 mya (95% CI 13.58-81.73), respectively, at least 9 million years  
125 (Megaannum, Ma) before the common ancestor of C1-5. Independent analysis with BEAST, using a  
126 smaller core gene dataset (see *Methods*), provided broader estimates of clade emergence, though the  
127 emergence order was maintained; C1-5 12.01 mya (95% CI 6.80-33.47), C-II 37.12 mya (95% CI  
128 20.95-103.48), C-I 65.93 mya (95% CI 37.32-183.84) and C-III 142.13 mya (95% CI 79.77-397.18)  
129 (Fig. 4).

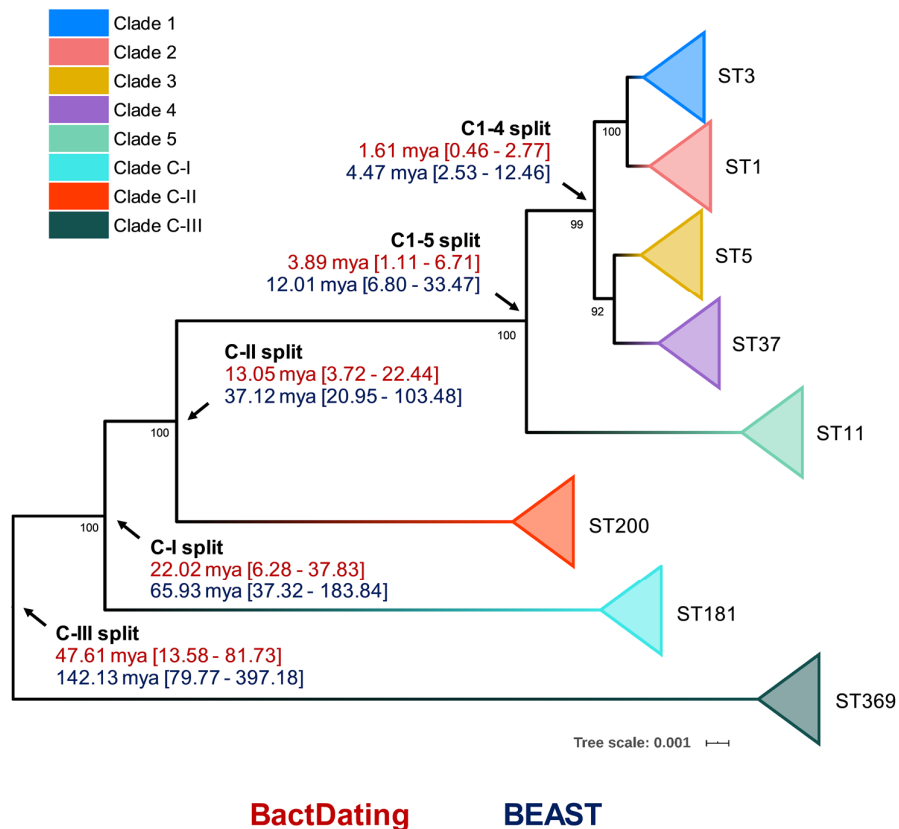

**Figure 4. Bayesian analysis of species and clade divergence.** BactDating and BEAST estimates of the age of major *C. difficile* clades. Node dating ranges for both Bayesian approaches are transposed onto an ML phylogeny built from concatenated MLST alleles of a dozen STs from each clade. Archetypal STs in each evolutionary clade are indicated. The tree is midpoint rooted and bootstrap values are shown. Scale bar indicates the number of substitutions per site. BactDating places the time of most recent common ancestor of C1-5 at 3.89 million years ago (mya) [95% credible interval (CI), 1.11-6.71 mya]. Of the cryptic clades, C-II shared the most recent common ancestor with C1-5 13.05 mya [95% CI 3.72-22.44 mya], followed by C-I (22.02 mya [95% CI 6.28-37.83 mya]), and C-III (47.61 mya [95% CI 13.58-81.73 mya]). Comparative estimates from BEAST are clades C1-5 (12.01 mya [95% CI 6.80-33.47 mya]), C-II (37.12 mya [95% CI 20.95-103.48 mya]), C-I (65.93 mya [95% CI 37.32-183.84 mya]), and C-III (142.13 [95% CI 79.77-397.18 mya]).

130 Next, to identify their true taxonomic placement, ANI was determined for ST181 (C-I), ST200 (C-II)  
 131 and ST369 (C-III) against two reference datasets. The first dataset comprised 25 species belonging to  
 132 the *Peptostreptococcaceae* as defined by Lawson *et al.*<sup>23</sup> in their 2016 reclassification of *Clostridium*  
 133 *difficile* to *Clostridioides difficile*. The second dataset comprised 5,895 complete genomes across 21  
 134 phyla from the NCBI RefSeq database (accessed 14<sup>th</sup> January 2020), including 1,366 genomes  
 135 belonging to *Firmicutes*, 92 genomes belonging to 15 genera within the *Clostridiales* and 20  
 136 *Clostridium* and *Clostridioides* species. The nearest ANI matches to species within the  
 137 *Peptostreptococcaceae* dataset were *C. difficile* (range 89.3-93.5% ANI), *Asaccharospora irregularis*  
 138 (78.9-79.0% ANI) and *Romboutsia lituseburensis* (78.4-78.7% ANI). Notably, *Clostridioides*  
 139 *mangenotii*, the only other known member of *Clostridioides*, shared only 77.2-77.8% ANI with the  
 140 cryptic clade genomes (**Table 1**).

141 Similarly, the nearest ANI matches to species within the RefSeq dataset were several  
 142 *C. difficile* strains (range C-I: 90.9-91.1%; C-II: 93.4-93.6%; and C-III: 89.2-89.4%) and  
 143 *Paeniclostridium sordellii* (77.7-77.9%). A low ANI (range  $\leq 70$ -75%) was observed between the  
 144 cryptic clade genomes and 20 members of the *Clostridium* including *C. tetani*, *C. botulinum*,  
 145 *C. perfringens* and *C. butyricum*, the type strain of the *Clostridium* genus *sensu stricto*. An updated  
 146 ANI-based taxonomy for the *Peptostreptococcaceae* is shown in **Fig. 5A**. The phylogeny places C-I,  
 147 C-II and C-III between *C. mangenotii* and *C. difficile* C1-5, suggesting that they should be assigned  
 148 to the *Clostridioides* genus, distinct from both *C. mangenotii* and *C. difficile*. Comparative analysis  
 149 of ANI and 16S rRNA values for the eight *C. difficile* clades and *C. mangenotii* shows significant  
 150 incongruence between the data generated by the two approaches (**Fig. 5B**). The range of 16S rRNA  
 151 % similarity between *C. difficile* C1-4, cryptic clades I-III and *C. mangenotii* was narrower (range  
 152 94.5-100) compared to the range of ANI values (range 77.8-98.7).

153 **Table 1 Whole-genome ANI analysis of cryptic clades vs. 25 *Peptostreptococcaceae* species**  
 154 **from Lawson *et al.*<sup>23</sup>.**

| Species                               | NCBI accession    | ANI %        |              |               |
|---------------------------------------|-------------------|--------------|--------------|---------------|
|                                       |                   | ST181 (C-I)  | ST200 (C-II) | ST369 (C-III) |
| <i>Clostridioides difficile</i> (ST3) | AQWV00000000.1    | 91.11        | 93.54        | 89.30         |
| <i>Asaccharospora irregularis</i>     | NZ_FQWX00000000   | 78.94        | 78.87        | 78.91         |
| <i>Romboutsia lituseburensis</i>      | NZ_FNGW00000000.1 | 78.51        | 78.36        | 78.66         |
| <i>Romboutsia ilealis</i>             | LN555523.1        | 78.45        | 78.54        | 78.44         |
| <i>Paraclostridium benzoelyticum</i>  | NZ_LBBT00000000.1 | 77.92        | 77.71        | 78.14         |
| <i>Paraclostridium bifermentans</i>   | NZ_AVNC00000000.1 | 77.89        | 77.89        | 78.06         |
| <i>Clostridium mangenotii</i>         | GCA_000687955.1   | 77.82        | 77.84        | 78.15         |
| <i>Paeniclostridium sordellii</i>     | NZ_APWR00000000.1 | 77.73        | 77.59        | 77.86         |
| <i>Clostridium hiranonis</i>          | NZ_ABWP01000000   | 77.52        | 77.42        | 77.59         |
| <i>Terrisporobacter glycolicus</i>    | NZ_AUUB00000000.1 | 77.47        | 77.53        | 77.53         |
| <i>Intestinibacter bartlettii</i>     | NZ_ABEZ00000000.2 | 77.29        | 77.52        | 77.48         |
| <i>Clostridium paradoxum</i>          | NZ_LSFY00000000.1 | 76.60        | 76.65        | 76.93         |
| <i>Clostridium thermoalcaliphilum</i> | NZ_MZGW00000000.1 | 76.49        | 76.61        | 76.85         |
| <i>Tepidibacter formicigenes</i>      | NZ_FRAE00000000.1 | 76.41        | 76.47        | 76.38         |
| <i>Tepidibacter mesophilus</i>        | NZ_BDQY00000000.1 | 76.38        | 76.44        | 76.22         |
| <i>Tepidibacter thalassicus</i>       | NZ_FQXH00000000.1 | 76.34        | 76.31        | 76.46         |
| <i>Peptostreptococcus russellii</i>   | NZ_JYGE00000000.1 | 76.30        | 76.08        | 76.38         |
| <i>Clostridium formicaceticum</i>     | NZ_CP020559.1     | 75.18        | 75.26        | 75.62         |
| <i>Clostridium caminithermale</i>     | FRAG00000000      | 74.97        | 75.07        | 75.03         |
| <i>Clostridium aceticum</i>           | NZ_JYHU00000000.1 | $\leq 70.00$ | $\leq 70.00$ | $\leq 70.00$  |
| <i>Clostridium litorale</i>           | FSRH01000000      | $\leq 70.00$ | $\leq 70.00$ | $\leq 70.00$  |
| <i>Eubacterium acidaminophilum</i>    | NZ_CP007452.1     | $\leq 70.00$ | $\leq 70.00$ | $\leq 70.00$  |
| <i>Filifactor alocis</i>              | NC_016630.1       | $\leq 70.00$ | $\leq 70.00$ | $\leq 70.00$  |
| <i>Peptostreptococcus anaerobius</i>  | ARMA01000000      | $\leq 70.00$ | $\leq 70.00$ | $\leq 70.00$  |
| <i>Peptostreptococcus stomatis</i>    | NZ_ADGQ00000000.1 | $\leq 70.00$ | $\leq 70.00$ | $\leq 70.00$  |

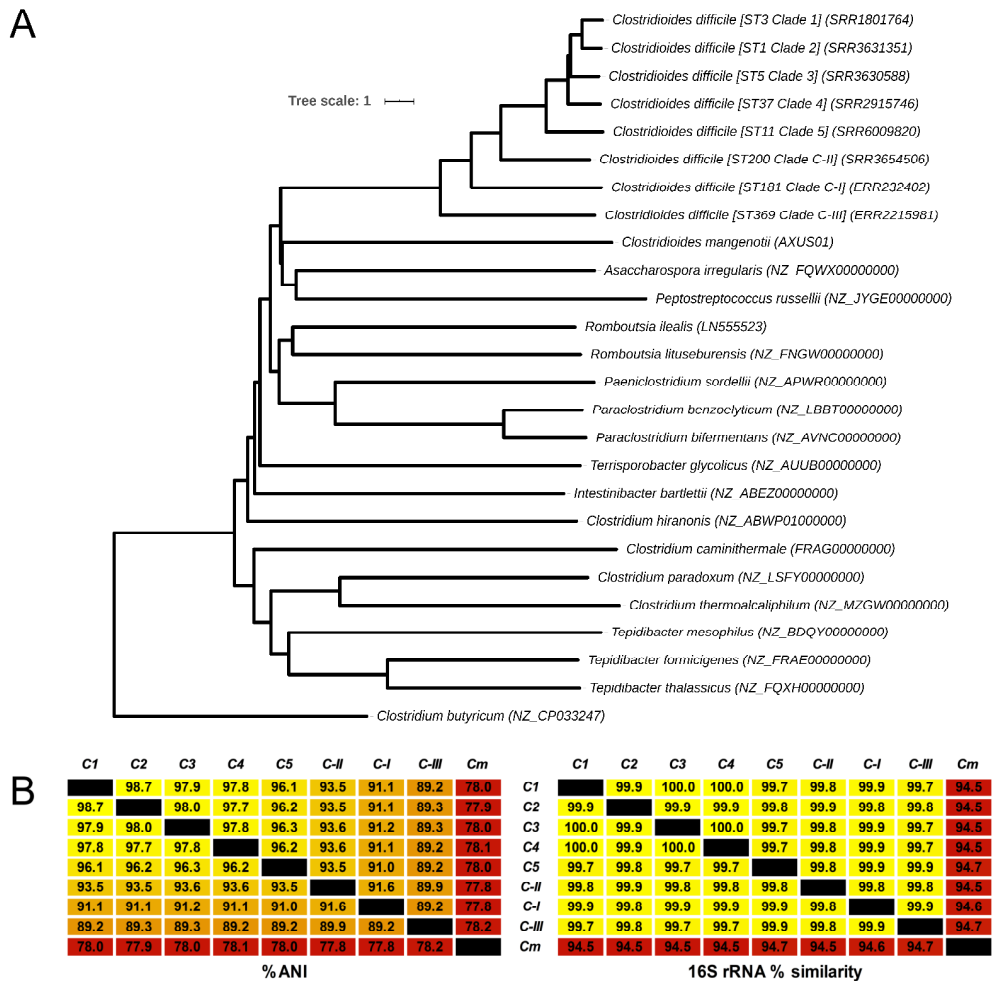

**Figure 5. Revised taxonomy for the *Peptostreptococcaceae*.** (A) ANI-based minimum evolution tree showing evolutionary relationship between eight *C. difficile* ‘clades’ along with 17 members of the *Peptostreptococcaceae* (from Lawson *et al*<sup>23</sup>) as well as *Clostridium butyricum* as the outgroup and type strain of the *Clostridium* genus *sensu stricto*. To convert the ANI into a distance, its complement to 1 was taken. (B) Matrices showing pairwise ANI and 16S rRNA values for the eight *C. difficile* clades and *C. manganotii*, the only other known member of *Clostridioides*.

155 **Evolutionary and ecological insights from the *C. difficile* species pangenome.** Next, we sought to  
 156 quantify the *C. difficile* species pangenome and identify genetic loci that are significantly associated  
 157 with the taxonomically divergent clades. With Panaroo, the *C. difficile* species pangenome comprised  
 158 17,470 genes, encompassing an accessory genome of 15,238 genes and a core genome of 2,232 genes,  
 159 just 12.8% of the total gene repertoire (Fig 6). The size of the pangenome reduced by 2,082 genes  
 160 with the exclusion of clades CI-III, and a further 519 genes with the exclusion of C5. Compared to  
 161 Panaroo, Roary overestimated the size of the pangenome (32,802 genes), resulting in markedly  
 162 different estimates of the percentage core genome, 3.9 and 12.8%, respectively (p<0.00001). Panaroo  
 163 can account for errors introduced during assembly and annotation, thus polishing the 260 Prokka-  
 164 annotated genomes with Panaroo resulted in a significant reduction in gene content per genome  
 165 (median 2.48%; 92 genes, range 1.24-12.40%; 82-107 genes, p<0.00001). The *C. difficile* species  
 166 pangenome was determined to be open<sup>28</sup> (Fig 6).

167 Pan-GWAS analysis with Scoary revealed 142 genes with significant clade specificity. Based  
 168 on KEGG orthology, these genes were classified into four functional categories: environmental



169 information processing (7), genetic information processing (39), metabolism (43), and signalling and  
 170 cellular processes (53). We identified several uniquely present, absent or organised gene clusters  
 171 associated with ethanolamine catabolism (C-III), heavy metal uptake (C-III), polyamine biosynthesis  
 172 (C-III), fructosamine utilisation (C-I, C-III), zinc transport (C-II, C5) and folate metabolism (C-I,  
 173 C5). A summary of the composition and function of these major lineage-specific gene clusters is  
 174 given in **Table 2**, and a comparative analysis of their respective genetic architecture can be found in  
 175 the **Supplementary Data**.

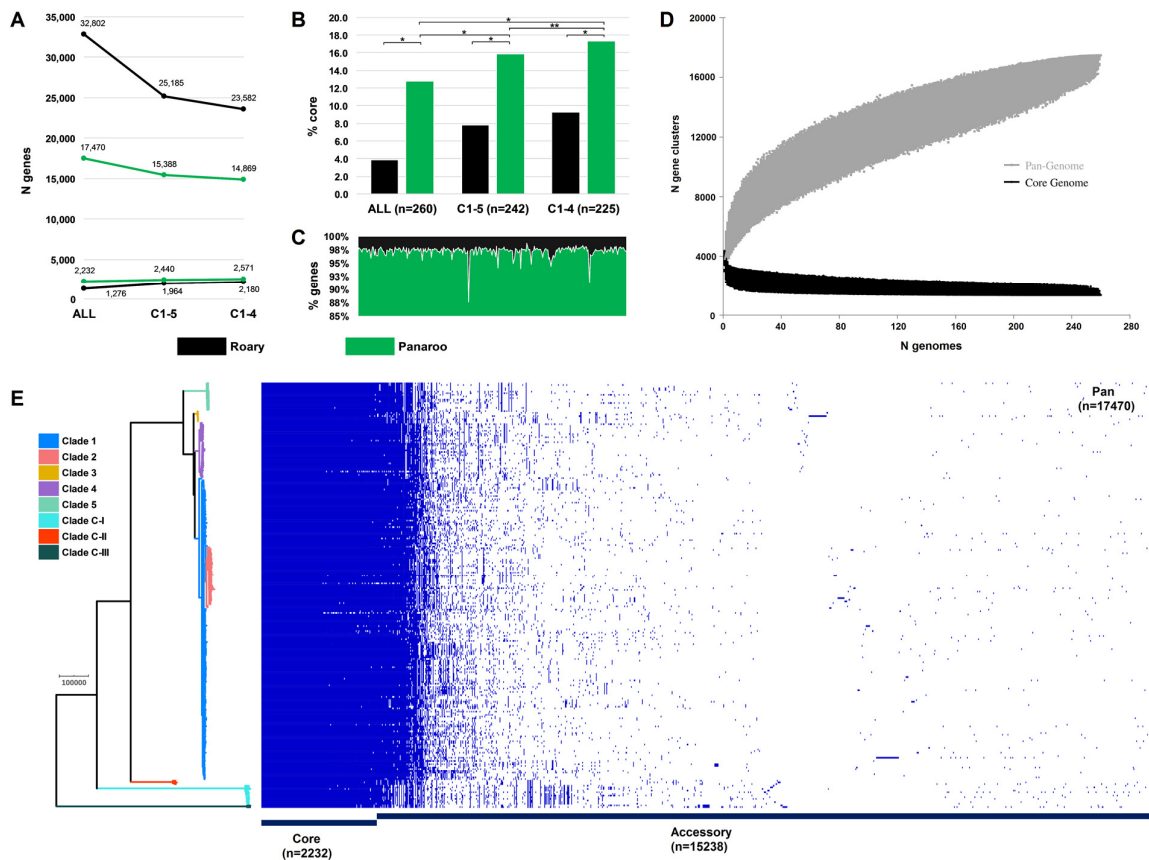

**Figure 6. *Clostridioides difficile* species pangenome.** (A) Pan and core genome estimates for all 260 STs, clades C1-4 (n=242 STs) and clades C1-5 (n=225 STs). (B) The difference in % core genome and pangenome sizes with Panaroo and Roary algorithms. (\*) indicates  $\chi^2 p < 0.00001$  and (\*\*) indicates  $\chi^2 p = 0.0008$ . (C) The proportion of retained genes per genome after polishing Prokka-annotated genomes with Panaroo. (D) The total number of genes in the pan (grey) and core (black) genomes are plotted as a function of the number of genomes sequentially added (n=260). Following the definition of Tettelin *et al.*<sup>28</sup>, the *C. difficile* species pangenome showed characteristics of an “open” pangenome. First, the pangenome increased in size exponentially with sampling of new genomes. At n=260, the pangenome exceeded more than double the average number of genes found in a single *C. difficile* genome (~3,700) and the curve was yet to reach a plateau or exponentially decay, indicating more sequenced strains are needed to capture the complete species gene repertoire. Second, the number of new ‘strain-specific’ genes did not converge to zero upon sequencing of additional strains, at n=260, an average of 27 new genes were contributed to the gene pool. Finally, according to Heap’s Law,  $\alpha$  values of  $\leq 1$  are representative of open pangenome. Rarefaction analysis of our pangenome curve using a power-law regression model based on Heap’s Law<sup>28</sup> showed the pangenome was predicted to be open ( $B_{pan} (\approx \alpha^{28}) = 0.47$ , curve fit,  $r^2=0.999$ ). (E) Presence absence variation (PAV) matrix for 260 *C. difficile* genomes is shown alongside a maximum-likelihood phylogeny built from a recombination-adjusted alignment of core genes from Panaroo (2,232 genes, 2,606,142 sites).

176 **Table 2 Major clade-specific gene clusters identified by pan-GWAS**

| Protein                                                          | Gene             | Clade specificity                                                                                                                                                                                                                                               | Functional insights                                                                                                                                                                            |                                                                                                                   |                                                                                                                                                                                                                             |
|------------------------------------------------------------------|------------------|-----------------------------------------------------------------------------------------------------------------------------------------------------------------------------------------------------------------------------------------------------------------|------------------------------------------------------------------------------------------------------------------------------------------------------------------------------------------------|-------------------------------------------------------------------------------------------------------------------|-----------------------------------------------------------------------------------------------------------------------------------------------------------------------------------------------------------------------------|
| Ethanolamine kinase                                              | <i>ETNK, EKI</i> | Unique to C-III and is in addition to the highly conserved <i>eut</i> cluster found in all lineages. Has a unique composition and includes six additional genes that are not present in the traditional CD630 <i>eut</i> operon or any other non-C-III strains. | An alternative process for the breakdown of ethanolamine and its utilisation as a source of reduced nitrogen and carbon.                                                                       |                                                                                                                   |                                                                                                                                                                                                                             |
| Agmatinase                                                       | <i>speB</i>      |                                                                                                                                                                                                                                                                 |                                                                                                                                                                                                |                                                                                                                   |                                                                                                                                                                                                                             |
| 1-propanol dehydrogenase                                         | <i>pduQ</i>      |                                                                                                                                                                                                                                                                 |                                                                                                                                                                                                |                                                                                                                   |                                                                                                                                                                                                                             |
| Ethanolamine utilization protein EutS                            | <i>eutS</i>      |                                                                                                                                                                                                                                                                 |                                                                                                                                                                                                |                                                                                                                   |                                                                                                                                                                                                                             |
| Ethanolamine utilization protein EutP                            | <i>eutP</i>      |                                                                                                                                                                                                                                                                 |                                                                                                                                                                                                |                                                                                                                   |                                                                                                                                                                                                                             |
| Ethanolamine ammonia-lyase large subunit                         | <i>eutB</i>      |                                                                                                                                                                                                                                                                 |                                                                                                                                                                                                |                                                                                                                   |                                                                                                                                                                                                                             |
| Ethanolamine ammonia-lyase small subunit                         | <i>eutC</i>      |                                                                                                                                                                                                                                                                 |                                                                                                                                                                                                |                                                                                                                   |                                                                                                                                                                                                                             |
| Ethanolamine utilization protein EutL                            | <i>eutL</i>      |                                                                                                                                                                                                                                                                 |                                                                                                                                                                                                |                                                                                                                   |                                                                                                                                                                                                                             |
| Ethanolamine utilization protein EutM                            | <i>eutM</i>      |                                                                                                                                                                                                                                                                 |                                                                                                                                                                                                |                                                                                                                   |                                                                                                                                                                                                                             |
| Acetaldehyde dehydrogenase                                       | <i>E1.2.1.10</i> |                                                                                                                                                                                                                                                                 |                                                                                                                                                                                                |                                                                                                                   |                                                                                                                                                                                                                             |
| Putative phosphotransacetylase                                   | <i>K15024</i>    |                                                                                                                                                                                                                                                                 |                                                                                                                                                                                                |                                                                                                                   |                                                                                                                                                                                                                             |
| Ethanolamine utilization protein EutN                            | <i>eutN</i>      |                                                                                                                                                                                                                                                                 |                                                                                                                                                                                                |                                                                                                                   |                                                                                                                                                                                                                             |
| Ethanolamine utilization protein EutQ                            | <i>eutQ</i>      |                                                                                                                                                                                                                                                                 |                                                                                                                                                                                                |                                                                                                                   |                                                                                                                                                                                                                             |
| TfoX/Sxy family protein                                          | -                |                                                                                                                                                                                                                                                                 |                                                                                                                                                                                                |                                                                                                                   |                                                                                                                                                                                                                             |
| Iron complex transport system permease protein                   | <i>ABC.FEV.P</i> | Unique to C-III                                                                                                                                                                                                                                                 | Multicomponent transport system with specificity for chelating heavy metal ions.                                                                                                               |                                                                                                                   |                                                                                                                                                                                                                             |
| Iron complex transport system ATP-binding protein                | <i>ABC.FEV.A</i> |                                                                                                                                                                                                                                                                 |                                                                                                                                                                                                |                                                                                                                   |                                                                                                                                                                                                                             |
| Iron complex transport system substrate-binding protein          | <i>ABC.FEV.S</i> |                                                                                                                                                                                                                                                                 |                                                                                                                                                                                                |                                                                                                                   |                                                                                                                                                                                                                             |
| Hydrogenase nickel incorporation protein HypB                    | <i>hypB</i>      |                                                                                                                                                                                                                                                                 |                                                                                                                                                                                                |                                                                                                                   |                                                                                                                                                                                                                             |
| Putative ABC transport system ATP-binding protein                | <i>yxgL</i>      |                                                                                                                                                                                                                                                                 |                                                                                                                                                                                                |                                                                                                                   |                                                                                                                                                                                                                             |
| Class I SAM-dependent methyltransferase                          | -                |                                                                                                                                                                                                                                                                 |                                                                                                                                                                                                |                                                                                                                   |                                                                                                                                                                                                                             |
| Peptide/nickel transport system substrate-binding protein        | <i>ABC.PE.S</i>  |                                                                                                                                                                                                                                                                 |                                                                                                                                                                                                |                                                                                                                   |                                                                                                                                                                                                                             |
| Peptide/nickel transport system permease protein                 | <i>ABC.PE.P</i>  |                                                                                                                                                                                                                                                                 |                                                                                                                                                                                                |                                                                                                                   |                                                                                                                                                                                                                             |
| Peptide/nickel transport system permease protein                 | <i>ABC.PE.P1</i> |                                                                                                                                                                                                                                                                 |                                                                                                                                                                                                |                                                                                                                   |                                                                                                                                                                                                                             |
| Peptide/nickel transport system ATP-binding protein              | <i>ddpD</i>      |                                                                                                                                                                                                                                                                 |                                                                                                                                                                                                |                                                                                                                   |                                                                                                                                                                                                                             |
| Oligopeptide transport system ATP-binding protein                | <i>oppF</i>      |                                                                                                                                                                                                                                                                 |                                                                                                                                                                                                |                                                                                                                   |                                                                                                                                                                                                                             |
| Class I SAM-dependent methyltransferase                          | -                |                                                                                                                                                                                                                                                                 |                                                                                                                                                                                                |                                                                                                                   |                                                                                                                                                                                                                             |
| Heterodisulfide reductase subunit D [EC:1.8.98.1]                | <i>hdrD</i>      |                                                                                                                                                                                                                                                                 |                                                                                                                                                                                                | Unique to C-III and is in addition to the highly conserved spermidine uptake cluster found in all other lineages. | Alternative spermidine uptake processes which may play a role in stress response to nutrient limitation. The additional cluster has homologs in <i>Romboutsia</i> , <i>Paraclostridium</i> and <i>Paeniclostridium</i> spp. |
| CDP-L-myo-inositol myo-inositolphosphotransferase                | <i>dipps</i>     |                                                                                                                                                                                                                                                                 |                                                                                                                                                                                                |                                                                                                                   |                                                                                                                                                                                                                             |
| Spermidine/putrescine transport system substrate-binding protein | <i>ABC.SP.S</i>  |                                                                                                                                                                                                                                                                 |                                                                                                                                                                                                |                                                                                                                   |                                                                                                                                                                                                                             |
| Spermidine/putrescine transport system permease protein          | <i>ABC.SP.P1</i> |                                                                                                                                                                                                                                                                 |                                                                                                                                                                                                |                                                                                                                   |                                                                                                                                                                                                                             |
| Spermidine/putrescine transport system permease protein          | <i>ABC.SP.P</i>  |                                                                                                                                                                                                                                                                 |                                                                                                                                                                                                |                                                                                                                   |                                                                                                                                                                                                                             |
| Spermidine/putrescine transport system ATP-binding protein       | <i>potA</i>      |                                                                                                                                                                                                                                                                 |                                                                                                                                                                                                |                                                                                                                   |                                                                                                                                                                                                                             |
| Sigma -54 dependent transcriptional regulator                    | <i>gfrR</i>      | Present in all lineages except C-I. Cluster found in a different genomic position in C-III.                                                                                                                                                                     | Mannose-type PTS system essential for utilisation of fructoselysine such as fructoselysine and glucoselysine, abundant components of rotting fruit and vegetable matter.                       |                                                                                                                   |                                                                                                                                                                                                                             |
| Fructoselysine/glucoselysine PTS system EIIB component           | <i>gfrB</i>      |                                                                                                                                                                                                                                                                 |                                                                                                                                                                                                |                                                                                                                   |                                                                                                                                                                                                                             |
| Mannose PTS system EIIA component                                | <i>manXa</i>     |                                                                                                                                                                                                                                                                 |                                                                                                                                                                                                |                                                                                                                   |                                                                                                                                                                                                                             |
| Fructoselysine/glucoselysine PTS system EIIC component           | <i>gfrC</i>      |                                                                                                                                                                                                                                                                 |                                                                                                                                                                                                |                                                                                                                   |                                                                                                                                                                                                                             |
| Fructoselysine/glucoselysine PTS system EIID component           | <i>gfrD</i>      |                                                                                                                                                                                                                                                                 |                                                                                                                                                                                                |                                                                                                                   |                                                                                                                                                                                                                             |
| SIS domain-containing protein                                    | -                |                                                                                                                                                                                                                                                                 |                                                                                                                                                                                                |                                                                                                                   |                                                                                                                                                                                                                             |
| Fur family transcriptional regulator, ferric uptake regulator    | <i>furB</i>      | Unique to C-II and C5                                                                                                                                                                                                                                           | Associated with EDTA resistance in <i>E. coli</i> , helping the bacteria survive in Zn-depleted environment.                                                                                   |                                                                                                                   |                                                                                                                                                                                                                             |
| Zinc transport system substrate-binding protein                  | <i>znuA</i>      |                                                                                                                                                                                                                                                                 |                                                                                                                                                                                                |                                                                                                                   |                                                                                                                                                                                                                             |
| Fe-S-binding protein                                             | <i>yeiR</i>      |                                                                                                                                                                                                                                                                 |                                                                                                                                                                                                |                                                                                                                   |                                                                                                                                                                                                                             |
| Rrf2 family transcriptional regulator                            | -                |                                                                                                                                                                                                                                                                 |                                                                                                                                                                                                |                                                                                                                   |                                                                                                                                                                                                                             |
| Putative signalling protein                                      | -                | Unique to C-I and C5 STs 163, 280, and 386                                                                                                                                                                                                                      | In <i>E. coli</i> , AbgAB proteins enable uptake and cleavage of the folate catabolite <i>p</i> -aminobenzoyl-glutamate, allowing the bacterium to survive on exogenous sources of folic acid. |                                                                                                                   |                                                                                                                                                                                                                             |
| Aminobenzoyl-glutamate utilization protein B                     | <i>abgB</i>      |                                                                                                                                                                                                                                                                 |                                                                                                                                                                                                |                                                                                                                   |                                                                                                                                                                                                                             |
| MarR family transcriptional regulator                            | -                |                                                                                                                                                                                                                                                                 |                                                                                                                                                                                                |                                                                                                                   |                                                                                                                                                                                                                             |

177 **Cryptic clades CI-III possessed highly divergent toxin gene architecture.** Overall, 68.8%  
 178 (179/260) of STs harboured *tcdA* (toxin A) and/or *tcdB* (toxin B), indicating their ability to cause  
 179 CDI, while 67 STs (25.8%) harboured *cdtA/cdtB* (binary toxin). The most common genotype was  
 180 A<sup>+</sup>B<sup>+</sup>CDT<sup>-</sup> (113/187; 60.4%), followed by A<sup>+</sup>B<sup>+</sup>CDT<sup>+</sup> (49/187; 26.2%), A<sup>-</sup>B<sup>+</sup>CDT<sup>+</sup> (10/187; 5.3%),  
 181 A<sup>-</sup>B<sup>-</sup>CDT<sup>+</sup> (8/187; 4.3%) and A<sup>-</sup>B<sup>+</sup>CDT<sup>-</sup> (7/187; 3.7%). Toxin gene content varied across clades  
 182 (C1, 116/149, 77.9%; C2, 35/35, 100.0%; C3, 7/7, 100.0%; C4, 6/34, 17.6%; C5, 18/18, 100.0%;  
 183 C-I, 2/12, 16.7%; C-II, 1/3, 33.3%; C-III, 2/2, 100.0%) (**Fig. 7**).

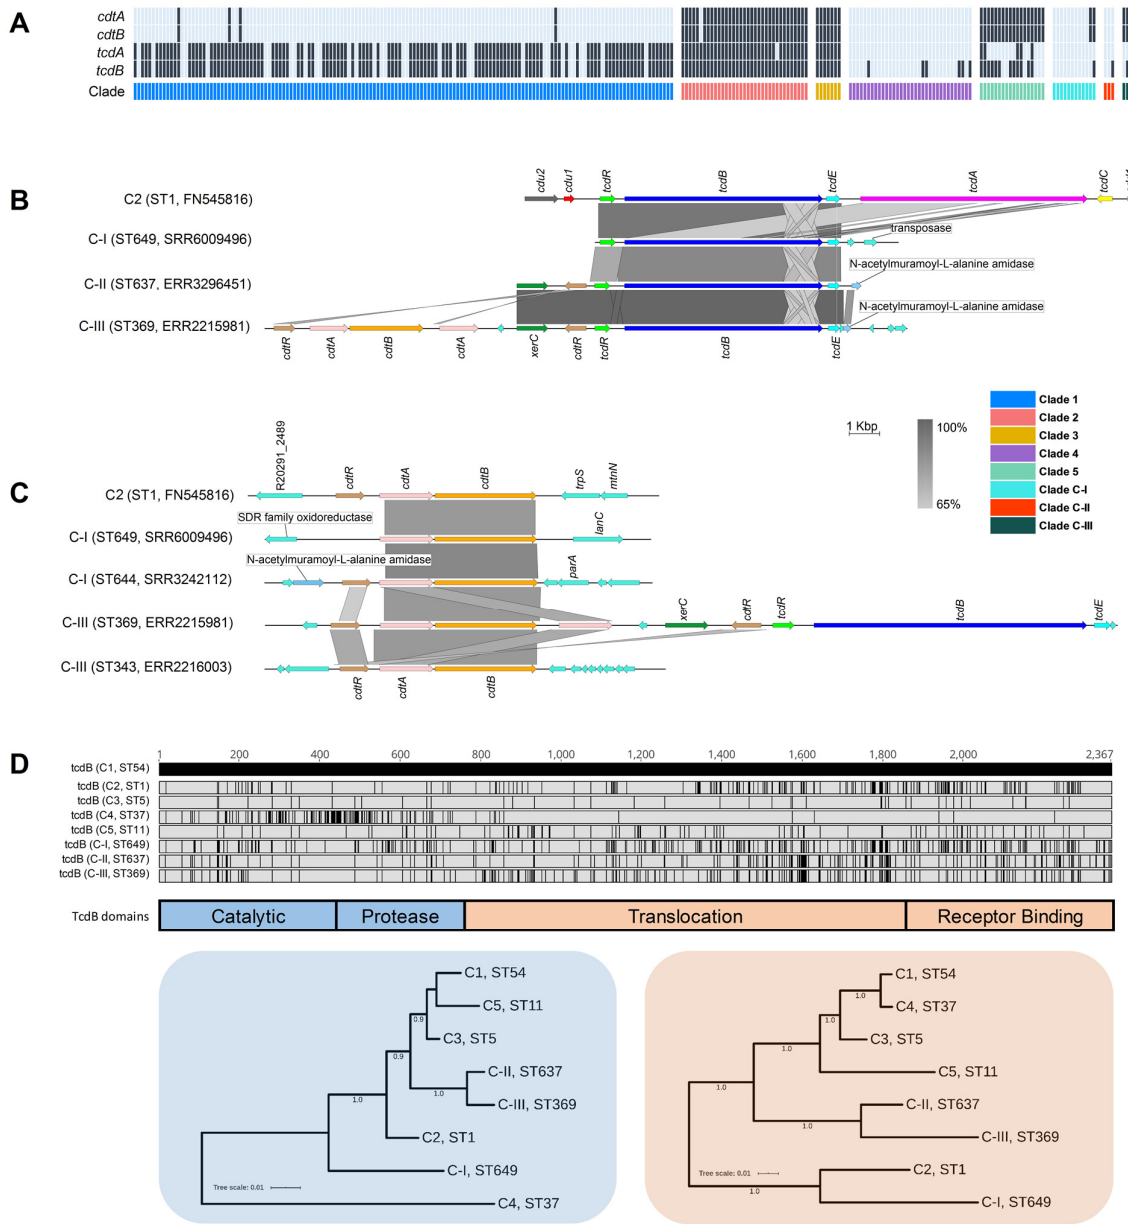

**Figure 7. Toxin gene analysis.** (A) Distribution of toxin genes across *C. difficile* clades (n=260 STs). Presence is indicated by black bars and absence by light blue bars. (B) Comparison of PaLoc architecture in the chromosome of strain R20291 (C2, ST1) and cognate chromosomal regions in genomes of cryptic STs 649 (C-I), 637 (C-II), and 369 (C-III). All three cryptic STs show atypical ‘monotoxin’ PaLoc structures, with the presence of syntenic *tcdR*, *tcdB*, and *tcdE*, and the absence of *tcdA*, *tcdC*, *cdd1* and *cdd2*. ST369 genome ERR2215981 shows colocalization of the PaLoc and CdtLoc, see below. (C) Comparison of CdtLoc architecture in the chromosome of strain R20291 (C2, ST1) and cognate chromosomal regions in genomes of cryptic STs 649/644 (C-I) and 343/369 (C-III). Several atypical CdtLoc features are observed; *cdtR* is absent in ST649, and an additional copy of *cdtA* is present in ST369, the latter comprising part of a CdtLoc co-located with the PaLoc. (D) Amino acid differences in TcdB among cryptic STs 649, 637, and 369 and reference strains from clades C1-5. Variations are shown as black lines relative to CD630 (C1, ST54). Phylogenies constructed from the catalytic and protease domains (in blue) and translocation and receptor-binding domains (in orange) of TcdB for the same eight STs included in (D). Scale bar shows the number of amino acid substitutions per site. Trees are mid-point rooted and supported by 500 bootstrap replicates.

184 Critically, at least one ST in each of clades C-I, C-II and C-III harboured divergent *tcdB* (89-94%  
185 identity to *tcdB*<sub>R20291</sub>) and/or *cdtAB* alleles (60-71% identity to *cdtA*<sub>R20291</sub>, 74-81% identity to  
186 *cdtB*<sub>R20291</sub>). These genes were located on atypical and novel PaLoc and CdtLoc structures flanked by  
187 mediators of lateral gene transfer (**Fig. 7**). Sequence types 359, 360, 361 and 649 (C-I), 637 (C-II)  
188 and 369 (C-III) harboured ‘monotoxin’ PaLocs characterised by the presence of syntenic *tcdR*, *tcdB*  
189 and *tcdE*, and complete absence of *tcdA* and *tcdC*. In STs 360 and 361 (C-I), and 637 (C-II), a gene  
190 encoding an endolysin with predicted N-acetylmuramoyl-L-alanine amidase activity (*cwlH*) was  
191 found adjacent to the phage-derived holin gene *tcdE*.

192 Remarkably, a full CdtLoc was found upstream of the PaLoc in ST369 (C-III). This CdtLoc  
193 was unusual, characterised by the presence of *cdtB*, two copies of *cdtA*, two copies of *cdtR* and *xerC*  
194 encoding a site-specific tyrosine recombinase (**Fig. 7**). Both ST644 (C-I) and ST343 (C-III) were  
195 CdtLoc-positive but PaLoc-negative (A-B-CDT<sup>+</sup>). In ST649 (C-I) *cdtR* was completely absent and,  
196 in ST343 (C-III), the entire CdtLoc was contained within the genome of a 56Kbp temperate  
197 bacteriophage termed ΦSemix9P1<sup>29</sup>. Toxin regulators TcdR and CdtR are highly conserved across  
198 clades C1-5<sup>21</sup>. In contrast, the CdtR of STs 644 (C-I), 343 (C-III) and 369 (C-III) shared only 46-54%  
199 amino acid identity (AAI) with CdtR of strain R20291 from clade 2 and ~40% AAI to each other.  
200 Similarly, the TcdR of ST 369 shared only 82.1% AAI compared to R20291 (**Supplementary Data**).

201 Compared to TcdB of R20291 (TcdB<sub>R20291</sub>), the shared AAI for TcdB<sub>ST649\_C-I</sub>, TcdB<sub>ST637\_C-II</sub>  
202 and TcdB<sub>ST369\_C-III</sub> were 94.0%, 90.5% and 89.4%, respectively. This sequence heterogeneity was  
203 confirmed through the detection of five distinct *HincII*/*AccI* digestion profiles of *tcdB* B1 fragments  
204 possibly reflecting novel toxinotypes (**Supplementary Data**). TcdB phylogenies identified clade C2  
205 as the most recent common ancestor for TcdB<sub>ST649\_C-I</sub> (**Fig. 7**). Phylogenetic subtyping analysis of the  
206 TcdB receptor-binding domain (RBD) showed the respective sequences in C-I, C-II and C-III  
207 clustered with *tcdB* alleles belonging to virulent C2 strains (**Supplementary Data**). Notably, the  
208 TcdB-RBD of ST649 (C-I) shared an AAI of 93.5% with TcdB-RBD allele type 8 belonging to  
209 hypervirulent STs 1 (RT027)<sup>13</sup> and 231 (RT251)<sup>30</sup>. Similarly, the closest match to *tcdB*-RBDs of  
210 ST637 (C-II) and ST369 (C-III) was allele type 10 (ST41, RT244)<sup>31</sup>.

## 211 Discussion

212 Through phylogenomic analysis of the largest and most diverse collection of *C. difficile* genomes to  
213 date, we identified major incoherence in *C. difficile* taxonomy, and provide new insight into intra-  
214 species diversity and evolution of pathogenicity in this major One Health pathogen.

215 Our analysis found high nucleotide identity (ANI > 97%) between *C. difficile* clades C1-4,  
216 indicating that strains from these four clades (comprising 560 known STs) belong to the same species.  
217 This is supported by our core genome and Bayesian analyses, which estimated the most recent  
218 common ancestor of *C. difficile* clades C1-4 existed ~1.61 mya. After this point, there appears to have  
219 been rapid population expansion into the four closely related extant clades described today, which  
220 include many of the most prevalent strains causing healthcare-associated CDI worldwide<sup>11</sup>. On the  
221 other hand, ANI between C5 and C1-4 is on the borderline of the accepted species threshold (95.9-  
222 96.2%) and their common ancestor existed 3.89 mya, over 2 Ma before C1-4 diverged. This degree  
223 of speciation likely reflects the unique ecology of C5 – a lineage comprising 33 known STs which is  
224 well established in non-human animal reservoirs worldwide and recently associated with CDI in the  
225 community setting<sup>32</sup>. We identified major taxonomic incoherence among the three cryptic clades and  
226 C1-5, evident by ANI values well below the species threshold (~91%, C-I; ~94%, C-II; and ~89%,  
227 C-III). Similar ANI value differences were seen between the cryptic clades themselves, indicating  
228 they are as divergent from each other as they are individually from C1-5. This extraordinary level of  
229 discontinuity is substantiated by our core genome and Bayesian analyses which estimated the  
230 common ancestors of clades C-I, C-II and C-III existed 13, 22 and 48 Ma, respectively, at least 9 to  
231 45 Ma before the common ancestor of C1-5. For context, divergence dates for other pathogens range  
232 from 10 Ma (*Campylobacter coli* and *C. jejuni*)<sup>33</sup>, 47 Ma (*Burkholderia pseudomallei* and  
233 *B. thailandensis*)<sup>34</sup> and 120 Ma (*Escherichia coli* and *Salmonella enterica*)<sup>35</sup>. Corresponding whole  
234 genome ANI values for these species are 86%, 94% and 82%, respectively (**Supplementary Data**).

235 Comparative ANI analysis of the cryptic clades with >5000 reference genomes across 21  
236 phyla failed to provide a better match than *C. difficile* (89-94% ANI). Similarly, our revised ANI-  
237 based taxonomy of the *Peptostreptococcaceae* placed clades C-I, C-II and C-III between *C. difficile*  
238 and *C. mangenotii*, the latter sharing ~77% ANI. The rate of 16S rRNA divergence in bacteria is  
239 estimated to be 1–2% per 50 Ma<sup>35</sup>. Contradicting our ANI and core genome data, 16S rRNA  
240 sequences were highly conserved across all 8 clades. This indicates that in *C. difficile*, 16S rRNA  
241 gene similarity correlates poorly with measures of genomic, phenotypic and ecological diversity, as  
242 reported in other taxa such as *Streptomyces*, *Bacillus* and *Enterobacteriaceae*<sup>36,37</sup>. Another interesting  
243 observation is that C5 and the three cryptic clades had a high proportion (>90%) of MLST alleles that  
244 were absent in other clades (**Supplementary Data**) suggesting minimal exchange of essential  
245 housekeeping genes between these clades. Whether this reflects divergence or convergence of two  
246 species, as seen in *Campylobacter*<sup>38</sup>, is unknown. Taken together, these data strongly support the  
247 reclassification of *C. difficile* clades C-I, C-II and C-III as novel independent *Clostridioides*  
248 genomospecies. There have been similar genome-based reclassifications in *Bacillus*<sup>39</sup>,  
249 *Fusobacterium*<sup>40</sup> and *Burkholderia*<sup>41</sup>. Also, a recent Consensus Statement<sup>42</sup> argues that the genomics  
250 and big data era necessitate easing of nomenclature rules to accommodate genome-based assignment  
251 of species status to nonculturable bacteria and those without ‘type material’, as is the case with these  
252 genomospecies.

253 The NCBI SRA was dominated by C1 and C2 strains, both in number and diversity. This  
254 apparent bias reflects the research community’s efforts to sequence the most prominent strains  
255 causing CDI in regions with the highest-burden, e.g. ST 1 from humans in Europe and North America.  
256 As such, there is a paucity of sequenced strains from diverse environmental sources, animal reservoirs  
257 or regions associated with atypical phenotypes. Cultivation bias - a historical tendency to culture,  
258 preserve and ultimately sequence *C. difficile* isolates that are concordant with expected phenotypic  
259 criteria, comes at the expense of ‘outliers’ or intermediate phenotypes. Members of the cryptic clades  
260 fit this criterion. They were first identified in 2012 but have been overlooked due to atypical toxin  
261 architecture which may compromise diagnostic assays (discussed below). Our updated MLST  
262 phylogeny shows as many as 55 STs across the three cryptic clades (C-I, n=25; C-II, n=9; C-III, n=21)  
263 (**Fig. 2**). There remains a further dozen ‘outliers’ which could either fit within these new taxa or be  
264 the first typed representative of additional genomospecies. The growing popularity of metagenomic  
265 sequencing of animal and environmental microbiomes will certainly identify further diversity within  
266 these taxa, including nonculturable strains<sup>43,44</sup>.

267 By analysing 260 STs across eight clades, we provide the most comprehensive pangenome  
268 analysis of *C. difficile* to date. Importantly, we also show that the choice of algorithm significantly  
269 affects pangenome estimation. The *C. difficile* pangenome was determined to be open (i.e. an  
270 unlimited gene repertoire) and vast in scale (over 17000 genes), much larger than previous estimates  
271 (~10000 genes) which mainly considered individual clonal lineages<sup>16,22</sup>. Conversely, comprising just  
272 12.8% of its genetic repertoire (2,232 genes), the core genome of *C. difficile* is remarkably small,  
273 consistent with earlier WGS and microarray-based studies describing ultralow genome conservation  
274 in *C. difficile*<sup>11,45</sup>. Considering only C1-5, the pangenome reduced in size by 12% (2,082 genes);  
275 another 519 genes were lost when considering only C1-4. These findings are consistent with our  
276 taxonomic data, suggesting the cryptic clades, and to a lesser extent C5, contribute a significant  
277 proportion of evolutionarily divergent and unique loci to the gene pool. A large open pangenome and  
278 small core genome are synonymous with a sympatric lifestyle, characterised by cohabitation with,  
279 and extensive gene transfer between, diverse communities of prokarya and archaea<sup>46</sup>. Indeed,  
280 *C. difficile* shows a highly mosaic genome comprising many phages, plasmids and integrative and  
281 conjugative elements<sup>11</sup>, and has adapted to survival in multiple niches including the mammalian  
282 gastrointestinal tract, water, soil and compost, and invertebrates<sup>32</sup>.

283 Through a robust Pan-GWAS approach we identified loci that are enriched or unique in the  
284 genomospecies. C-I strains were associated with the presence of transporter AbgB and absence of a  
285 mannose-type phosphotransferase (PTS) system. In *E. coli*, AbgAB proteins allow it to survive on  
286 exogenous sources of folate<sup>47</sup>. In many enteric species, the mannose-type PTS system is essential for

287 catabolism of fructosamines such as glucoselysine and fructoselysine, abundant components of  
288 rotting fruit and vegetable matter<sup>48</sup>. C-II strains contained Zn transporter loci *znuA* and *yeiR*, in  
289 addition to Zn transporter ZupT which is highly conserved across all eight *C. difficile* clades.  
290 *S. enterica* and *E. coli* harbour both *znuA/yeiR* and ZupT loci, enabling survival in Zn-depleted  
291 environments<sup>49</sup>. C-III strains were associated with major gene clusters encoding systems for  
292 ethanolamine catabolism, heavy metal transport and spermidine uptake. The C-III *eut* gene cluster  
293 encoded six additional kinases, transporters and transcription regulators absent from the highly  
294 conserved *eut* operon found in other clades. Ethanolamine is a valuable source of carbon and/or  
295 nitrogen for many bacteria, and *eut* gene mutations (in C1/C2) impact toxin production *in vivo*<sup>50</sup>. The  
296 C-III metal transport gene cluster encoded a chelator of heavy metal ions and a multi-component  
297 transport system with specificity for iron, nickel and glutathione. The conserved spermidine operon  
298 found in all *C. difficile* clades is thought to play an important role in various stress responses including  
299 during iron limitation<sup>51</sup>. The additional, divergent spermidine transporters found in C-III were similar  
300 to regions in closely related genera *Romboutsia* and *Paeniclostridium* (data not shown). Together,  
301 these data provide preliminary insights into the biology and ecology of the genomospecies. Most  
302 differential loci identified were responsible for extra or alternate metabolic processes, some not  
303 previously reported in *C. difficile*. It is therefore tempting to speculate that the evolution of alternate  
304 biosynthesis pathways in these species reflects distinct ancestries and metabolic responses to evolving  
305 within markedly different ecological niches.

306 This work demonstrates the presence of toxin genes on PaLoc and CdtLoc structures in all  
307 three genomospecies, confirming their clinical relevance. Monotoxin PaLocs were characterised by  
308 the presence of *tcdR*, *tcdB* and *tcdE*, the absence of *tcdA* and *tcdC*, and flanking by transposases and  
309 recombinases which mediate LGT<sup>20, 21, 52</sup>. These findings support the notion that the classical bi-toxin  
310 PaLoc common to clades C1-5 was derived by multiple independent acquisitions and stable fusion of  
311 monotoxin PaLocs from ancestral Clostridia<sup>52</sup>. Moreover, the presence of syntenic PaLoc and CdtLoc  
312 (in ST369, C-I), the latter featuring two copies of *cdtA* and *cdtR*, and a recombinase (*xerC*), further  
313 support this PaLoc fusion hypothesis<sup>52</sup>.

314 Bacteriophage holin and endolysin enzymes coordinate host cell lysis, phage release and toxin  
315 secretion<sup>53</sup>. Monotoxin PaLocs comprising phage-derived holin (*tcdE*) and endolysin (*cwlH*) genes  
316 were first described in C-I strains<sup>52</sup>. We have expanded this previous knowledge by demonstrating  
317 that syntenic *tcdE* and *cwlH* are present within monotoxin PaLocs across all three genomospecies.  
318 Moreover, since some strains contained *cwlH* but lacked toxin genes, this gene seems to be implicated  
319 in toxin acquisition. These data, along with the detection of a complete and functional<sup>29</sup> CdtLoc  
320 contained within ΦSemix9P1 in ST343 (C-III), further substantiate the role of phages in the evolution  
321 of toxin loci in *C. difficile* and related Clostridia<sup>53</sup>.

322 The CdtR and TcdR sequences of the new genomospecies are unique and further work is  
323 needed to determine if these regulators display different mechanisms or efficiencies of toxin  
324 expression<sup>12</sup>. The presence of dual copies of CdtR in ST369 (C-I) is intriguing, as analogous  
325 duplications in PaLoc regulators have not been documented. One of these CdtR had a mutation at a  
326 key phosphorylation site (Asp61→Asn61) and possibly shows either reduced wild-type activity or  
327 non-functionality, as seen in ST11<sup>54</sup>. This might explain the presence of a second CdtR copy.

328 TcdB alone can induce host innate immune and inflammatory responses leading to intestinal  
329 and systemic organ damage<sup>55</sup>. Our phylogenetic analysis shows TcdB sequences from the three  
330 genomospecies are related to TcdB in Clade 2 members, specifically ST1 and ST41, both virulent  
331 lineages associated with international CDI outbreaks<sup>13, 31</sup>, and causing classical or variant  
332 (*C. sordellii*-like) cytopathic effects, respectively<sup>56</sup>. It would be relevant to explore whether the  
333 divergent PaLoc and CdtLoc regions confer differences in biological activity, as these may present  
334 challenges for the development of effective broad-spectrum diagnostic assays, and vaccines. We have  
335 previously demonstrated that common laboratory diagnostic assays may be challenged by changes in  
336 the PaLoc of C-I strains<sup>21</sup>. The same might be true for monoclonal antibody-based treatments for CDI  
337 such as bezlotoxumab, known to have distinct neutralizing activities against different TcdB  
338 subtypes<sup>57</sup>.

339 Our findings highlight major incongruence in *C. difficile* taxonomy, identify differential  
340 patterns of diversity among major clades and advance understanding of the evolution of the PaLoc  
341 and CdtLoc. While our analysis is limited solely to the genomic differences between *C. difficile*  
342 clades, our data provide a robust genetic foundation for future studies to focus on the phenotypic,  
343 ecological and epidemiological features of these interesting groups of strains, including defining the  
344 biological consequences of clade-specific genes and pathogenic differences *in vitro* and *in vivo*.  
345 Finally, our findings reinforce that the epidemiology of this important One Health pathogen is not  
346 fully understood. Enhanced surveillance of CDI and WGS of new and emerging strains to better  
347 inform the design of diagnostic tests and vaccines are key steps in combating the ongoing threat posed  
348 by *C. difficile*.

## 349 **Methods**

350 **Genome collection.** We retrieved the entire collection of *C. difficile* genomes (taxid ID 1496) held  
351 at the NCBI Sequence Read Archive [<https://www.ncbi.nlm.nih.gov/sra/>]. The raw dataset (as of 1<sup>st</sup>  
352 January 2020), comprised 12,621 genomes. After filtering for redundancy and Illumina paired-end  
353 data (all platforms and read lengths), 12,304 genomes (97.5%) were available for analysis.

354 **Multi-locus sequence typing.** Sequence reads were interrogated for multi-locus sequence type (ST)  
355 using SRST2 v0.1.8<sup>58</sup>. New alleles, STs and clade assignments were verified by submission of  
356 assembled contigs to PubMLST [<https://pubmlst.org/cdifficile/>]. A species-wide phylogeny was  
357 generated from 659 ST alleles sourced from PubMLST (dated 01-Jan-2020). Alleles were  
358 concatenated in frame and aligned with MAFFT v7.304. A final neighbour-joining tree was generated  
359 in MEGA v10<sup>59</sup> and annotated using iTOL v4 [<https://itol.embl.de/>].

360 **Genome assembly and quality control.** Genomes were assembled, annotated and evaluated using a  
361 pipeline comprising TrimGalore v0.6.5, SPAdes v3.6.043, Prokka v1.14.5, and QUAST v2.344<sup>16</sup>.  
362 Next, Kraken2 v2.0.8-beta<sup>60</sup> was used to screen for contamination and assign taxonomic labels to  
363 reads and draft assemblies.

364 **Taxonomic analyses.** Species-wide genetic similarity was determined by computation of whole-  
365 genome ANI for 260 STs. Both alignment-free and conventional alignment-based ANI approaches  
366 were taken, implemented in FastANI<sup>5</sup> v1.3 and the Python module pyani<sup>61</sup> v0.2.9, respectively.  
367 FastANI calculates ANI using a unique *k*-mer based alignment-free sequence mapping engine, whilst  
368 pyani utilises two different classical alignment ANI algorithms based on BLAST+ (ANiB) and  
369 MUMmer (ANIm). A 96% ANI cut-off was used to define species boundaries<sup>4</sup>. For taxonomic  
370 placement, ANI was determined for divergent *C. difficile* genomes against two datasets comprising  
371 (i) members of the *Peptostreptococcaceae* (n=25)<sup>23</sup>, and (ii) the complete NCBI RefSeq database  
372 (n=5895 genomes, <https://www.ncbi.nlm.nih.gov/refseq/>, accessed 14<sup>th</sup> Jan 2020). Finally,  
373 comparative identity analysis of consensus 16S rRNA sequences for *C. mangenotii* type strain  
374 DSM1289T<sup>23</sup> (accession FR733662.1) and representatives of each *C. difficile* clade was performed  
375 using Clustal Omega <https://www.ebi.ac.uk/Tools/msa/clustalo/>.

376 **Estimates of clade and species divergence.** BactDating v1.0.1<sup>62</sup> was applied to the recombination-  
377 corrected phylogeny produced by Gubbins (471,708 core-genome sites) with Markov chain Monte  
378 Carlo (MCMC) chains of 10<sup>7</sup> iterations sampled every 10<sup>4</sup> iterations with a 50% burn-in. A strict  
379 clock model was used with a rate of 2.5×10<sup>-9</sup> to 1.5×10<sup>-8</sup> substitutions per site per year, as previously  
380 defined by He *et al.*<sup>16</sup> and Kumar *et al.*<sup>27</sup>. The effective sample sizes (ESS) were >200 for all estimated  
381 parameters, and traces were inspected manually to ensure convergence. To provide an independent  
382 estimate from BactDating, BEAST v1.10.4<sup>63</sup> was run on a recombination-filtered gap-free alignment  
383 of 10,466 sites with MCMC chains of 5×10<sup>8</sup> iterations, with a 9×10<sup>-7</sup> burn-in, that were sampled  
384 every 10<sup>4</sup> iterations. The strict clock model described above was used in combination with the discrete  
385 GTR gamma model of heterogeneity among sites and skyline population model. MCMC convergence  
386 was verified with Tracer v1.7.1 and ESS for all estimated parameters were >150. For ease of

387 comparison, clade dating from both approaches were transposed onto a single MLST phylogeny. Tree  
388 files are available as **Supplementary Data** at <http://doi.org/10.6084/m9.figshare.12471461>.

389 **Pangenome analysis.** The 260 ST dataset was used for pangenome analysis with Panaroo v1.1.0<sup>64</sup>  
390 and Roary v3.6.0<sup>65</sup>. Panaroo was run with default thresholds for core assignment (98%) and blastP  
391 identity (95%). Roary was run with a default threshold for core assignment (99%) and two different  
392 thresholds for BlastP identity (95%, 90%). Sequence alignment of the final set of core genes (Panaroo;  
393 n=2,232 genes, 2,606,142 bp) was performed using MAFFT v7.304 and recombinative sites were  
394 filtered using Gubbins v7.304<sup>66</sup>. A recombinant adjusted alignment of 471,708 polymorphic sites was  
395 used to create a core genome phylogeny with RAxML v8.2.12 (GTR gamma model of among-site  
396 rate-heterogeneity), which was visualised alongside pangenome data in Phandango<sup>67</sup>. Pangenome  
397 dynamics were investigated with PanGP v1.0.1<sup>16</sup>.

398 Scoary<sup>68</sup> v1.6.16 was used to identify genetic loci that were statistically associated with each  
399 clade via a Pangenome-Wide Association Study (pan-GWAS). The Panaroo-derived pangenome  
400 (n=17,470) was used as input for Scoary with the evolutionary clade of each genome depicted as a  
401 discrete binary trait. Scoary was run with 1,000 permutation replicates and genes were reported as  
402 significantly associated with a trait if they attained *p*-values (empirical, naïve and Benjamini-  
403 Hochberg-corrected) of  $\leq 0.05$ , a sensitivity and specificity of  $> 99\%$  and  $97.5\%$ , respectively, and  
404 were not annotated as “hypothetical proteins”. All significantly associated genes were reannotated  
405 using prokka and BlastP and functional classification (KEGG orthology) was performed using the  
406 Koala suite of web-based annotation tools<sup>69</sup>.

407 **Comparative analysis of toxin gene architecture.** The 260 ST genome dataset was screened for the  
408 presence of *tcdA*, *tcdB*, *cdtA* and *cdtB* using the Virulence Factors Database (VFDB) compiled within  
409 ABRicate v1.0 [<https://github.com/tseemann/abricate>]. Results were corroborated by screening raw  
410 reads against the VFDB using SRST2 v0.1.8<sup>58</sup>. Both approaches employed minimum coverage and  
411 identity thresholds of 90 and 75%, respectively. Comparative analysis of PaLoc and CdtLoc  
412 architecture was performed by mapping of reads with Bowtie2 v.2.4.1 to cognate regions in reference  
413 strain R20291 (ST1, FN545816). All PaLoc and CdtLoc loci investigated showed sufficient coverage  
414 for accurate annotation and structural inference. Genome comparisons were visualized using ACT  
415 and figures prepared with Easyfig<sup>21</sup>. MUSCLE-aligned TcdB sequences were visualized in Geneious  
416 v2020.1.2 and used to create trees in iTOL v4.

417 **Statistical analyses.** All statistical analyses were performed using SPSS v26.0 (IBM, NY, USA). For  
418 pangenome analyses, Chi-squared test with Yate's correction was used to compare the proportion of  
419 core genes and a One-tailed Mann-Whitney U test was used to demonstrate the reduction of gene  
420 content per genome, with a *p*-value  $\leq 0.05$  considered statistically significant.

## 421 **References**

- 422 1. Doolittle WF, Papke RT. Genomics and the bacterial species problem. *Genome Biol* **7**, 116  
423 (2006).
- 424 2. Konstantinidis KT, Ramette A, Tiedje JM. The bacterial species definition in the genomic era.  
425 *Philos Trans R Soc Lond B Biol Sci* **361**, 1929-1940 (2006).
- 426 3. Wayne LG, *et al.* Report of the ad hoc committee on reconciliation of approaches to bacterial  
427 systematics. *Int J Syst Evol Microbiol* **37**, 463-464 (1987).
- 428 4. Ciufu S, *et al.* Using average nucleotide identity to improve taxonomic assignments in  
429 prokaryotic genomes at the NCBI. *Int J Syst Evol Microbiol* **68**, 2386-2392 (2018).
- 430
- 431
- 432
- 433



- 434 5. Jain C, Rodriguez RL, Phillippy AM, Konstantinidis KT, Aluru S. High throughput ANI analysis  
435 of 90K prokaryotic genomes reveals clear species boundaries. *Nat Commun* **9**, 5114 (2018).  
436
- 437 6. Richter M, Rossello-Mora R. Shifting the genomic gold standard for the prokaryotic species  
438 definition. *Proc Natl Acad Sci U S A* **106**, 19126-19131 (2009).  
439
- 440 7. Guh AY, *et al.* Trends in US burden of *Clostridioides difficile* infection and outcomes. *N Engl J*  
441 *Med* **382**, 1320-1330 (2020).  
442
- 443 8. CDC. Antibiotic resistance threats in the United States, 2013. Centers for Disease Control and  
444 Prevention. Web citation: <http://www.cdc.gov/drugresistance/threat-report-2013/>. (2013).  
445
- 446 9. CDC. Antibiotic resistance threats in the United States, 2019. Centers for Disease Control and  
447 Prevention. Web citation: <https://www.cdc.gov/drugresistance/biggest-threats.html>., (2019).  
448
- 449 10. Lim S, Knight D, Riley T. *Clostridium difficile* and One Health. *Clinical Microbiology and*  
450 *Infection*, (2019).  
451
- 452 11. Knight DR, Elliott B, Chang BJ, Perkins TT, Riley TV. Diversity and evolution in the genome  
453 of *Clostridium difficile*. *Clin Microbiol Rev* **28**, 721-741 (2015).  
454
- 455 12. Chandrasekaran R, Lacy DB. The role of toxins in *Clostridium difficile* infection. *FEMS*  
456 *Microbiol Rev* **41**, 723-750 (2017).  
457
- 458 13. He M, *et al.* Emergence and global spread of epidemic healthcare-associated *Clostridium*  
459 *difficile*. *Nat Genet* **45**, 109-113 (2013).  
460
- 461 14. Shaw HA, *et al.* The recent emergence of a highly related virulent *Clostridium difficile* clade  
462 with unique characteristics. *Clin Microbiol Infect* **26**, 492-498 (2020).  
463
- 464 15. Imwattana K, *et al.* *Clostridium difficile* ribotype 017 - characterization, evolution and  
465 epidemiology of the dominant strain in Asia. *Emerg Microb Infect* **8**, 796-807 (2019).  
466
- 467 16. Knight DR, *et al.* Evolutionary and genomic insights into *Clostridioides difficile* sequence type  
468 11: a diverse, zoonotic and antimicrobial resistant lineage of global One Health importance. *MBio*  
469 **10**, e00446-00419 (2019).  
470
- 471 17. Dingle KE, *et al.* Evolutionary history of the *Clostridium difficile* pathogenicity locus. *Genome*  
472 *Biol Evol* **6**, 36-52 (2014).  
473
- 474 18. Didelot X, *et al.* Microevolutionary analysis of *Clostridium difficile* genomes to investigate  
475 transmission. *Genome Biol* **13**, R118 (2012).  
476
- 477 19. Janezic S, Potocnik M, Zidaric V, Rupnik M. Highly divergent *Clostridium difficile* strains  
478 isolated from the environment. *PLoS One* **11**, e0167101 (2016).  
479
- 480 20. Ramirez-Vargas G, Rodriguez C. Putative conjugative plasmids with *tcdB* and *cdtAB* genes in  
481 *Clostridioides difficile*. *Clin Infect Dis* **26**, 2287-2290 (2020).  
482
- 483 21. Ramírez-Vargas G, *et al.* Novel Clade CI *Clostridium difficile* strains escape diagnostic tests,  
484 differ in pathogenicity potential and carry toxins on extrachromosomal elements. *Sci Rep* **8**, 1-  
485 11 (2018).

- 486  
487 22. Knight DR, Squire MM, Collins DA, Riley TV. Genome analysis of *Clostridium difficile* PCR  
488 ribotype 014 lineage in Australian pigs and humans reveals a diverse genetic repertoire and  
489 signatures of long-range interspecies transmission. *Front Microbiol* **7**, 2138 (2017).  
490  
491 23. Lawson PA, Citron DM, Tyrrell KL, Finegold SM. Reclassification of *Clostridium difficile* as  
492 *Clostridioides difficile* (Hall and O'Toole 1935) Prevot 1938. *Anaerobe* **40**, 95-99 (2016).  
493  
494 24. Oren A, Rupnik M. *Clostridium difficile* and *Clostridioides difficile*: Two validly published and  
495 correct names. *Anaerobe* **52**, 125-126 (2018).  
496  
497 25. Knetsch CW, *et al.* Comparative analysis of an expanded *Clostridium difficile* reference strain  
498 collection reveals genetic diversity and evolution through six lineages. *Infect Genet Evol* **12**,  
499 1577-1585 (2012).  
500  
501 26. He M, *et al.* Evolutionary dynamics of *Clostridium difficile* over short and long time scales. *Proc*  
502 *Natl Acad Sci U S A* **107**, 7527-7532 (2010).  
503  
504 27. Kumar N, *et al.* Adaptation of host transmission cycle during *Clostridium difficile* speciation.  
505 *Nat Genet* **51**, 1315-1320 (2019).  
506  
507 28. Tettelin H, *et al.* Genome analysis of multiple pathogenic isolates of *Streptococcus agalactiae*:  
508 implications for the microbial “pan-genome”. *Proc Natl Acad Sci U S A* **102**, 13950-13955  
509 (2005).  
510  
511 29. Riedel T, *et al.* A *Clostridioides difficile* bacteriophage genome encodes functional binary toxin-  
512 associated genes. *J Biotechnol* **250**, 23-28 (2017).  
513  
514 30. Hong S, Knight DR, Chang B, Carman RJ, Riley TV. Phenotypic characterisation of *Clostridium*  
515 *difficile* PCR ribotype 251, an emerging multi-locus sequence type clade 2 strain in Australia.  
516 *Anaerobe* **60**, 102066 (2019).  
517  
518 31. Eyre DW, *et al.* Emergence and spread of predominantly community-onset *Clostridium difficile*  
519 PCR ribotype 244 infection in Australia, 2010 to 2012. *Euro Surveill* **20**, 21059 (2015).  
520  
521 32. Knight DR, Riley TV. Genomic delineation of zoonotic origins of *Clostridium difficile*. *Front*  
522 *Pub Health* **7**, 164 (2019).  
523  
524 33. Sheppard SK, Maiden MC. The evolution of *Campylobacter jejuni* and *Campylobacter coli*. *Cold*  
525 *Spring Harb Perspect Biol* **7**, a018119 (2015).  
526  
527 34. Yu Y, *et al.* Genomic patterns of pathogen evolution revealed by comparison of *Burkholderia*  
528 *pseudomallei*, the causative agent of melioidosis, to avirulent *Burkholderia thailandensis*. *BMC*  
529 *Microbiol* **6**, 46 (2006).  
530  
531 35. Ochman H, Elwyn S, Moran NA. Calibrating bacterial evolution. *Proc Natl Acad Sci U S A* **96**,  
532 12638-12643 (1999).  
533  
534 36. Janda JM, Abbott SL. 16S rRNA gene sequencing for bacterial identification in the diagnostic  
535 laboratory: pluses, perils, and pitfalls. *J Clin Microbiol* **45**, 2761-2764 (2007).  
536

- 537 37. Chevrette MG, Carlos-Shanley C, Louie KB, Bowen BP, Northen TR, Currie CR. Taxonomic  
538 and metabolic incongruence in the ancient genus *Streptomyces*. *Front Microbiol* **10**, 2170 (2019).  
539
- 540 38. Sheppard SK, McCarthy ND, Falush D, Maiden MC. Convergence of *Campylobacter* species:  
541 implications for bacterial evolution. *Science* **320**, 237-239 (2008).  
542
- 543 39. Liu Y, Lai QL, Shao ZZ. Genome analysis-based reclassification of *Bacillus weihenstephanensis*  
544 as a later heterotypic synonym of *Bacillus mycoides*. *Int J Syst Evol Microbiol* **68**, 106-112  
545 (2018).  
546
- 547 40. Kook JK, *et al.* Genome-based reclassification of *Fusobacterium nucleatum* subspecies at the  
548 species level. *Curr Microbiol* **74**, 1137-1147 (2017).  
549
- 550 41. Loveridge EJ, *et al.* Reclassification of the specialized metabolite producer *Pseudomonas*  
551 *mesoacidophila* ATCC 31433 as a member of the *Burkholderia cepacia* complex. *J Bacteriol*  
552 **199**, e00125-00117 (2017).  
553
- 554 42. Murray AE, *et al.* Roadmap for naming uncultivated Archaea and Bacteria. *Nat Microbiol* **5**,  
555 987-994 (2020).  
556
- 557 43. Stewart RD, *et al.* Assembly of 913 microbial genomes from metagenomic sequencing of the  
558 cow rumen. *Nat Commun* **9**, 1-11 (2018).  
559
- 560 44. Lu X, *et al.* Bacterial pathogens and community composition in advanced sewage treatment  
561 systems revealed by metagenomics analysis based on high-throughput sequencing. *PLoS One* **10**,  
562 e0125549 (2015).  
563
- 564 45. Scaria J, Ponnala L, Janvilisri T, Yan W, Mueller LA, Chang YF. Analysis of ultra low genome  
565 conservation in *Clostridium difficile*. *PLoS One* **5**, e15147 (2010).  
566
- 567 46. Medini D, Donati C, Tettelin H, Massignani V, Rappuoli R. The microbial pan-genome. *Curr*  
568 *Opin Genet Dev* **15**, 589-594 (2005).  
569
- 570 47. Carter EL, Jager L, Gardner L, Hall CC, Willis S, Green JM. *Escherichia coli* abg genes enable  
571 uptake and cleavage of the folate catabolite p-aminobenzoyl-glutamate. *J Bacteriol* **189**, 3329-  
572 3334 (2007).  
573
- 574 48. Miller KA, Phillips RS, Kilgore PB, Smith GL, Hoover TR. A mannose family  
575 phosphotransferase system permease and associated enzymes are required for utilization of  
576 fructoselysine and glucoselysine in *Salmonella enterica* serovar Typhimurium. *J Bacteriol* **197**,  
577 2831-2839 (2015).  
578
- 579 49. Sabri M, Houle S, Dozois CM. Roles of the extraintestinal pathogenic *Escherichia coli* ZnuACB  
580 and ZupT zinc transporters during urinary tract infection. *Infect Immun* **77**, 1155-1164 (2009).  
581
- 582 50. Nawrocki KL, Wetzel D, Jones JB, Woods EC, McBride SM. Ethanolamine is a valuable nutrient  
583 source that impacts *Clostridium difficile* pathogenesis. *Environ Microbiol* **20**, 1419-1435 (2018).  
584
- 585 51. Berges M, *et al.* Iron regulation in *Clostridioides difficile*. *Front Microbiol* **9**, 3183 (2018).  
586
- 587 52. Monot M, *et al.* *Clostridium difficile*: new insights into the evolution of the pathogenicity locus.  
588 *Sci Rep* **5**, 15023 (2015).

- 589  
590 53. Fortier LC. Bacteriophages contribute to shaping *Clostridioides (Clostridium) difficile* species.  
591 *Front Microbiol* **9**, 2033 (2018).  
592  
593 54. Bilverstone TW, Minton NP, Kuehne SA. Phosphorylation and functionality of CdtR in  
594 *Clostridium difficile*. *Anaerobe* **58**, 103-109 (2019).  
595  
596 55. Carter GP, *et al.* Defining the roles of TcdA and TcdB in localized gastrointestinal disease,  
597 systemic organ damage, and the host response during *Clostridium difficile* infections. *MBio* **6**,  
598 e00551 (2015).  
599  
600 56. Lanis JM, Barua S, Ballard JD. Variations in TcdB activity and the hypervirulence of emerging  
601 strains of *Clostridium difficile*. *PLoS Pathog* **6**, e1001061 (2010).  
602  
603 57. Shen E, *et al.* Subtyping analysis reveals new variants and accelerated evolution of *Clostridioides*  
604 *difficile* toxin B. *Commun Biol* **3**, 1-8 (2020).  
605  
606 58. Inouye M, *et al.* SRST2: rapid genomic surveillance for public health and hospital microbiology  
607 labs. *Genome Med* **6**, 90 (2014).  
608  
609 59. Kumar S, Stecher G, Li M, Knyaz C, Tamura K. MEGA X: molecular evolutionary genetics  
610 analysis across computing platforms. *Mol Biol Evol* **35**, 1547-1549 (2018).  
611  
612 60. Wood DE, Lu J, Langmead B. Improved metagenomic analysis with Kraken 2. *Genome Biol* **20**,  
613 257 (2019).  
614  
615 61. Pritchard L, Glover RH, Humphris S, Elphinstone JG, Toth IK. Genomics and taxonomy in  
616 diagnostics for food security: soft-rotting enterobacterial plant pathogens. *Anal Methods* **8**, 12-  
617 24 (2016).  
618  
619 62. Didelot X, Croucher NJ, Bentley SD, Harris SR, Wilson DJ. Bayesian inference of ancestral  
620 dates on bacterial phylogenetic trees. *Nucleic Acids Res* **46**, e134-e134 (2018).  
621  
622 63. Drummond AJ, Rambaut A. BEAST: Bayesian evolutionary analysis by sampling trees. *BMC*  
623 *Evol Biol* **7**, 214 (2007).  
624  
625 64. Tonkin-Hill G, *et al.* Producing polished prokaryotic pangenomes with the panaroo pipeline.  
626 *Genome Biol* **21**, 180 (2020).  
627  
628 65. Page AJ, *et al.* Roary: rapid large-scale prokaryote pan genome analysis. *Bioinformatics*  
629 **31**, 3691-3693 (2015).  
630  
631 66. Croucher NJ, *et al.* Rapid phylogenetic analysis of large samples of recombinant bacterial whole  
632 genome sequences using Gubbins. *Nucleic Acids Res* **43**, e15 (2015).  
633  
634 67. Hadfield J, Croucher NJ, Goater RJ, Abudahab K, Aanensen DM, Harris SR. Phandango: an  
635 interactive viewer for bacterial population genomics. *Bioinformatics* **34**, 292-293 (2018).  
636  
637 68. Brynildsrud O, Bohlin J, Scheffer L, Eldholm V. Rapid scoring of genes in microbial pan-  
638 genome-wide association studies with Scoary. *Genome Biol* **17**, 238 (2016).  
639

640 69. Kanehisa M, Sato Y, Morishima K. BlastKOALA and GhostKOALA: KEGG tools for functional  
641 characterization of genome and metagenome sequences. *J Mol Biol* **428**, 726-731 (2016).

### 642 **Author contributions**

643 D.R.K., K.I., D.W.E., and T.V.R. designed the study. D.R.K., K.I., C.R., B.K., E.G.A., and K.E.D.  
644 performed experimental work. D.R.K., K.I., C.R., B.K., E.G.A., D.P.S., X.D., K.E.D., D.W.E., C.R.,  
645 and T.V.R. analysed data and drafted the manuscript. All authors edited and approved the final  
646 version of the manuscript. The corresponding author had full access to all the data in the study and  
647 had final responsibility for the decision to submit for publication.

### 648 **Acknowledgements**

649 This work was supported, in part, by funding from The Raine Medical Research Foundation  
650 (RPG002-19) and a Fellowship from the National Health and Medical Research Council  
651 (APP1138257) awarded to D.R.K. K.I. is a recipient of the Mahidol Scholarship from Mahidol  
652 University, Thailand. This work was also supported by EULac project ‘Genomic Epidemiology of  
653 *Clostridium difficile* in Latin America (T020076)’ and by the Millennium Science Initiative of the  
654 Ministry of Economy, Development and Tourism of Chile, grant ‘Nucleus in the Biology of Intestinal  
655 Microbiota’ to D.P.S. This research used the facilities and services of the Pawsey Supercomputing  
656 Centre [Perth, Western Australia] and the Australian Genome Research Facility [Melbourne,  
657 Victoria].

### 658 **Competing Interests**

659 DWE declares lecture fees from Gilead, outside the submitted work. No other author has a conflict  
660 of interest to declare.

### 661 **Additional information**

662 Supplementary Data is available at <http://doi.org/10.6084/m9.figshare.12471461>
